# Supplementary material
Source: PubMed Central journal article supplement (PMC4086837)

## SUPPLEMENTARY INFORMATION

EGFR inhibition attenuates liver fibrosis and development of hepatocellular carcinoma  
Bryan C. Fuchs, Yujin Hoshida, Tsutomu Fujii, Suguru Yamada, Gregory Y. Lauwers,  
Christopher M. McGinn, Lan Wei, Toshihiko Kuroda, Michael Lanuti, Anthony D. Schmitt,  
Supriya Gupta, Andrew Crenshaw, Robert Onofrio, Bradley Taylor, Wendy Winckler,  
Todd R. Golub and Kenneth K. Tanabe

### Experimental Procedures

**Chemicals.** Stock solutions of erlotinib (Tarceva™; Genentech, South San Francisco, CA) were prepared in DMSO and diluted in water before intraperitoneal (IP) injection.

**Tissue Specimens.** Tissue from human cirrhosis patients was obtained under protocols approved by the Dana-Farber Harvard Cancer Center Office for Protection of Human Subjects and the Partners Human Research Committee.

**Cells and Culture Conditions.** The human HSC cell line, TWNT-4 (1), was kindly provided by Dr. Sangeeta Bhatia (Massachusetts Institute of Technology, Cambridge, MA). Cells were cultured in DMEM (4.5 mg/ml glucose, 2 mM L-glutamine) with 10% fetal bovine serum (FBS) that was supplemented with 100 units/ml penicillin and 100 mg/ml streptomycin (all from MediaTech CellGro, Herndon, VA). Cells were maintained at 37°C in a humidified incubator with 5% CO<sub>2</sub> in air.

**Diethylnitrosamine (DEN) Rat Model.** Male Wistar rats received weekly IP injections of DEN (50 mg/kg) or PBS control for 18 weeks. A subset of rats received either daily (5X a week) IP injections of 2 mg/kg erlotinib (N = 8) or vehicle (N = 8) during weeks 13 - 18. In a separate study, the erlotinib dose was lowered to 0.5 mg/kg (N = 8). Using an mg/m<sup>2</sup> conversion, a human chemotherapeutic dose of erlotinib equates to approximately 7 mg/kg in rats. The vehicle groups from the two studies were not

significantly different so they were combined together for analysis. Rats were sacrificed at 9, 13 and 19 weeks after a one-week washout period to eliminate acute effects of DEN. At the time of sacrifice, tumors were counted and measured, and the liver was then sectioned and fixed in 10% formalin. The remaining portions of the liver were snap-frozen and stored at -80°C until use.

**Hepatectomy Study.** Male Wistar rats received weekly IP injections of DEN (50 mg/kg) for 18 weeks. After 12 weeks, the rats underwent a survival hepatectomy and a liver wedge biopsy was removed for histology. Rats then received either 2 mg/kg erlotinib (N = 8) or vehicle (N = 8) daily (5 days/week) during weeks 13 - 18. Rats were sacrificed at 19 weeks after a one-week washout of DEN and the liver was harvested for histology.

**Carbon tetrachloride (CCl<sub>4</sub>) Mouse Model.** Strain A/J male mice (Jackson Laboratory, Bar Harbor, ME) were treated three times a week for 18 weeks with either 0.1cc of a 40 percent solution of CCl<sub>4</sub> (Sigma) in olive oil or olive oil alone by oral gavage. A subset of mice received daily (5 days/week) IP injections of either 2 or 5 mg/kg erlotinib or vehicle (N = 8 for all three groups) during weeks 13 - 18. Using a mg/m<sup>2</sup> conversion, a human chemotherapeutic dose of erlotinib equates to approximately 30 mg/kg in mice. Mice were sacrificed at 19 weeks after a one-week washout to eliminate acute effects of CCl<sub>4</sub>, and the liver was harvested as described above.

**Bile duct ligation (BDL) Rat Model.** Male Wistar rats that had undergone a BDL (Charles River Labs) received daily (5 days/week) IP injections of 2 mg/kg erlotinib or vehicle (N = 8 for both groups) beginning 4 days after the BDL. Rats were sacrificed on Day 21, and the liver was harvested as described above.

**Primary rat hepatic stellate cell (HSC) isolation.** HSC were isolated according to an established protocol (2). Briefly, rat livers were perfused with a buffer containing collagenase A and pronase (both from Sigma). The digested liver was filtered through a 100 µm nylon membrane and hepatocytes were removed by centrifugation. The purity of isolated HSCs was assessed by their content of fluorescent retinoid droplets under UV excitation.

**Histology, immunohistochemistry, immunofluorescence.** Formalin-fixed samples were embedded in paraffin, cut into 5 µm-thick sections and stained with hematoxylin-eosin (H-E), Masson's trichrome and Sirius red according to standard procedures. Trichrome stained sections were analyzed to score the amount of liver disease according to the method of Ishak (3) as described in Supplementary Table 1. Collagen was morphometrically quantified on Sirius red stained sections with image processing software (ImageJ, NIH). Additional sections were stained with antibodies specific for Ki67 (Abcam, Cambridge, MA), p-EGFR (Tyr1068) (Cell Signaling Technology, Beverly, MA) or alpha-smooth muscle actin ( $\alpha$ -SMA; DakoCytomation, Denmark). Ki67 positive cells were morphometrically quantified with image processing software (ImageJ). For dual immunofluorescence, sections were co-stained with antibodies specific for phospho-EGFR (Tyr1068) (Cell Signaling Technology) and either  $\alpha$ -SMA (Abcam), glial fibrillary acidic protein (GFAP; DakoCytomation) or desmin (Abcam) with detection by appropriate secondary antibodies labeled with either Cy3 or Alexa 488 according to the manufacturer's instructions. All slides were reviewed blindly by the same liver pathologist.

**Liver Function Tests.** A cardiac terminal blood withdrawal was performed at the time of sacrifice. Blood was allowed to clot for 2 h at room temperature before centrifugation at

2,000 rpm for 10 min at 4° C. Serum was isolated and stored at -80° C prior to use.

Liver injury and liver failure were assessed by measuring the serum levels of several biochemical markers including alkaline phosphatase (ALP), alanine transaminase (ALT), aspartate transaminase (AST), total bilirubin (TBIL), albumin (Alb) and glucose (Glu) (DRI-CHEM 4000 Analyzer, Heska, Switzerland).

**Hydroxyproline analysis and western blotting.** Hydroxyproline in tissue was quantified by HPLC analysis as previously described (4). Western blot analysis was performed as previously described (5). Liver lysates from every animal from each group at all the time points were analyzed and representative samples are shown. For HSC experiments, either rat primary HSC cultures or TWNT-4 cells were serum starved overnight in DMEM with 0.1% FBS before the addition 100 ng/ml EGF with or without 2  $\mu$ M erlotinib for 30 minutes. The following antibodies were used: EGFR, phospho-EGFR (Tyr1068), p44/42 mitogen-activated protein kinase (ERK), phospho-ERK (Thr202/Tyr204), proliferating cell nuclear antigen (PCNA), platelet-derived growth factor receptor-beta (PDGFR $\beta$ ) (all from Cell Signaling Technology),  $\alpha$ -SMA (Abcam) and  $\beta$ -actin (Sigma). Band intensities were quantified by image analysis software (Labworks 4.5; UVP Inc., Upland, CA). Each western blot was repeated to ensure reproducible results.

**Real-Time PCR.** Total RNA was isolated from animal liver tissue using TRIzol (Invitrogen, Carlsbad, CA) according to the manufacturer's instructions and subsequently treated with DNase I (Promega, Madison, WI). 1  $\mu$ g of total RNA from each sample was used to create cDNA by single strand reverse transcription (SuperScript III First-Strand Synthesis SuperMix for qRT-PCR; Invitrogen). Quantitative real-time PCR was performed using the 7900HT Fast Real-Time PCR System with commercial

TaqMan primers for cytochrome P450 2E1 (CYP2E1), amphiregulin (AREG), betacellulin (BTC), epiregulin (EREG), heparin-binding EGF-like growth factor (HB-EGF) and transforming growth factor- $\alpha$  (TGF- $\alpha$ ) (Life Technologies, Grand Island, NY). Primers and conditions are available upon request. TWNT-4 cells were plated at  $1 \times 10^5$  cells/ml in 10 ml media in a 100 mm plate and treated with or without 2  $\mu$ M erlotinib the next day. Total RNA was extracted 72 hours later and cDNA synthesized as described above. Expression of  $\alpha$ -SMA and  $\alpha$ 1(I) procollagen mRNA was analyzed by quantitative real-time PCR (LightCycler; Roche Diagnostics Corporation, Indianapolis, IN). mRNA expression was normalized to the expression of  $\beta$ -actin. Primer sequences are as follows:  $\alpha$ -SMA forward TTCAATGTCCCAGCCATGTA and reverse GAAGGAATAGCCACGCTCAG,  $\alpha$ 1(I) procollagen forward AACATGACCAAAAACCAAAAGTG and reverse CATTGTTTCCTGTGTCTTCTGG, and Actin forward CCTGGACTTCGAGCAAGAGAT and reverse GCCGATCCACACGGAGTACT. All reactions were performed in duplicate and the experiment was repeated to ensure reproducible results.

**Microarray Analysis.** Total RNA was extracted from either non-tumor liver tissue or HCC tissue using TRIzol (Invitrogen, Carlsbad, CA) according to the manufacturer's instructions and subsequently treated with DNase I (Promega, Madison, WI). Absence and presence of tumor was confirmed by H-E staining of the tissue sections. Genome-wide gene expression profiling for the rats and mice was performed using RatRef-12 and Mouse Ref-8 Expression BeadChip microarrays, respectively (Illumina, San Diego, CA). Scanned data were normalized using cubic spline algorithm (6), summarized into official gene symbol, and mapped to human orthologous genes using the mapping table provided by the Jackson laboratory ([www.informatics.jax.org](http://www.informatics.jax.org)). The dataset is available at

NCBI Gene Expression Omnibus (GEO) with accession number GSE27641

(<http://www.ncbi.nlm.nih.gov/geo/query/acc.cgi?token=xvelpumoegoykba&acc=GSE27641>).

The 186-gene signature predictive of survival of patients with cirrhosis (7) and HCC (8) has been described elsewhere. EGF target gene signatures were previously generated in primary human foreskin microvascular endothelial cells (9), a normal human breast epithelial cell line (MCF10A) and a human cervical cancer cell line (HeLa) (10). Induction of the gene expression signatures was evaluated using Gene Set Enrichment Analysis (11). Briefly, genes on the microarray were rank-ordered according to differential expression between the experimental conditions. Over- or under-representation of each gene signature on the rank-ordered gene list was evaluated based on random permutation test. False discovery rate (FDR) <0.25 was regarded as statistically significant. All microarray data analysis was performed using GenePattern analysis toolkit (12) ([www.genepattern.org](http://www.genepattern.org)) and R statistical computing language ([www.r-project.org](http://www.r-project.org)).

**Survival analysis.** The association between high EGF expression and survival was analyzed by Cox score. Gene-expression profiling was previously performed according to the complementary DNA-mediated annealing, selection, extension, and ligation (DASL) assay (Illumina) on formalin-fixed, paraffin-embedded blocks of tumor and surrounding tissue from patients who were consecutively treated with surgery for primary HCC between 1990 and 2001 at Toranomon Hospital in Tokyo and for whom data on clinical outcomes (over a median follow-up period of 7.8 years) were available (8). Surrounding and tumor tissue samples from the same patients were analyzed to identify the samples with the highest EGF expression (90<sup>th</sup> percentile).

**Statistical Analysis.** An unpaired two-tailed t-test was used to compare differences in body weights, liver weights, quantification of Sirius red stained sections, liver function tests and RNA expression.

**Supplementary Table 1.** Ishak scoring.

| <b>Score</b> | <b>Description</b>                                                                                                        |
|--------------|---------------------------------------------------------------------------------------------------------------------------|
| 0            | No fibrosis                                                                                                               |
| 1            | Fibrous expansion of some portal areas, with or without short fibrous septa                                               |
| 2            | Fibrous expansion of most portal areas, with or without short fibrous septa                                               |
| 3            | Fibrous expansion of most portal areas, with occasional portal to portal bridging                                         |
| 4            | Fibrous expansion of most portal areas, with marked portal to portal bridging as well as portal areas to central bridging |
| 5            | Marked bridging with occasional nodules                                                                                   |
| 6            | Probable to definite cirrhosis                                                                                            |



**Supplementary Table 2.** Enrichment of drug metabolizing enzymes in erlotinib-treated DEN rats and CCl<sub>4</sub> mice.

| <b>DEN Rats</b>                      |            |                |            |
|--------------------------------------|------------|----------------|------------|
| <b>Gene Set</b>                      | <b>NES</b> | <b>p-value</b> | <b>FDR</b> |
| KEGG_DRUG_METABOLISM_CYTOCHROME_P450 | 1.64       | 0.006          | 0.016      |
| KEGG_DRUG_METABOLISM_OTHER_ENZYMES   | 1.11       | 0.326          | 0.302      |
| <b>CCl<sub>4</sub> Mice</b>          |            |                |            |
| <b>Gene Set</b>                      | <b>NES</b> | <b>p-value</b> | <b>FDR</b> |
| KEGG_DRUG_METABOLISM_CYTOCHROME_P450 | 2.07       | <0.001         | <0.001     |
| KEGG_DRUG_METABOLISM_OTHER_ENZYMES   | 1.22       | 0.212          | 0.18       |

NES: normalized enrichment score, FDR: False discovery rate.

**Supplementary Table 3.** The 186-gene signature.

| GeneID                                            | Gene symbol | Description                                                                                    | Cox score |
|---------------------------------------------------|-------------|------------------------------------------------------------------------------------------------|-----------|
| <b><i>Genes Correlated with Poor Survival</i></b> |             |                                                                                                |           |
| 2488                                              | FSHB        | follicle stimulating hormone, beta polypeptide                                                 | 4.80      |
| 6456                                              | SH3GL2      | SH3-domain GRB2-like 2                                                                         | 4.21      |
| 23029                                             | RBM34       | RNA binding motif protein 34                                                                   | 4.19      |
| 23397                                             | NCAPH       | non-SMC condensin I complex, subunit H                                                         | 4.02      |
| 1950                                              | EGF         | epidermal growth factor (beta-urogastrone)                                                     | 3.97      |
| 7204                                              | TRIO        | triple functional domain (PTPRF interacting)                                                   | 3.90      |
| 1293                                              | COL6A3      | collagen, type VI, alpha 3                                                                     | 3.87      |
| 3983                                              | ABLIM1      | actin binding LIM protein 1                                                                    | 3.86      |
| 3680                                              | ITGA9       | integrin, alpha 9                                                                              | 3.81      |
| 4922                                              | NTS         | Neurotensin                                                                                    | 3.78      |
| 5055                                              | SERPINB2    | serpin peptidase inhibitor, clade B (ovalbumin), member 2                                      | 3.69      |
| 4316                                              | MMP7        | matrix metalloproteinase 7 (matrilysin, uterine)                                               | 3.59      |
| 5593                                              | PRKG2       | protein kinase, cGMP-dependent, type II                                                        | 3.44      |
| 9170                                              | EDG4        | endothelial differentiation, lysophosphatidic acid G-protein-coupled receptor, 4               | 3.40      |
| 4843                                              | NOS2A       | nitric oxide synthase 2A (inducible, hepatocytes)                                              | 3.33      |
| 2043                                              | EPHA4       | EPH receptor A4                                                                                | 3.25      |
| 6672                                              | SP100       | SP100 nuclear antigen                                                                          | 3.19      |
| 2326                                              | FMO1        | flavin containing monooxygenase 1                                                              | 3.04      |
| 2877                                              | GPX2        | glutathione peroxidase 2 (gastrointestinal)                                                    | 3.02      |
| 496                                               | ATP4B       | ATPase, H+/K+ exchanging, beta polypeptide                                                     | 2.99      |
| 8870                                              | IER3        | immediate early response 3                                                                     | 2.98      |
| 7456                                              | WIPF1       | WAS/WASL interacting protein family, member 1                                                  | 2.98      |
| 3489                                              | IGFBP6      | insulin-like growth factor binding protein 6                                                   | 2.93      |
| 1501                                              | CTNND2      | catenin (cadherin-associated protein), delta 2 (neural plakophilin-related arm-repeat protein) | 2.92      |
| 2200                                              | FBN1        | fibrillin 1                                                                                    | 2.91      |
| 2629                                              | GBA         | glucosidase, beta; acid (includes glucosylceramidase)                                          | 2.85      |
| 22858                                             | ICK         | intestinal cell (MAK-like) kinase                                                              | 2.85      |
| 10523                                             | CHERP       | calcium homeostasis endoplasmic reticulum protein                                              | 2.81      |
| 9734                                              | HDAC9       | histone deacetylase 9                                                                          | 2.81      |
| 51406                                             | NOL7        | nucleolar protein 7, 27kDa                                                                     | 2.80      |
| 8826                                              | IQGAP1      | IQ motif containing GTPase activating protein 1                                                | 2.79      |
| 120                                               | ADD3        | adducin 3 (gamma)                                                                              | 2.79      |
| 306                                               | ANXA3       | annexin A3                                                                                     | 2.78      |
| 10362                                             | HMG20B      | high-mobility group 20B                                                                        | 2.76      |
| 6558                                              | SLC12A2     | solute carrier family 12 (sodium/potassium/chloride transporters), member 2                    | 2.75      |
| 1282                                              | COL4A1      | collagen, type IV, alpha 1                                                                     | 2.75      |
| 1359                                              | CPA3        | carboxypeptidase A3 (mast cell)                                                                | 2.74      |

|                                            |          |                                                                                           |       |
|--------------------------------------------|----------|-------------------------------------------------------------------------------------------|-------|
| 3855                                       | KRT7     | keratin 7                                                                                 | 2.74  |
| 5271                                       | SERPINB8 | serpin peptidase inhibitor, clade B (ovalbumin), member 8                                 | 2.69  |
| 4791                                       | NFKB2    | nuclear factor of kappa light polypeptide gene enhancer in B-cells 2 (p49/p100)           | 2.67  |
| 165                                        | AEBP1    | AE binding protein 1                                                                      | 2.67  |
| 7041                                       | TGFB11   | transforming growth factor beta 1 induced transcript 1                                    | 2.66  |
| 2013                                       | EMP2     | epithelial membrane protein 2                                                             | 2.63  |
| 596                                        | BCL2     | B-cell CLL/lymphoma 2                                                                     | 2.63  |
| 5698                                       | PSMB9    | proteasome (prosome, macropain) subunit, beta type, 9 (large multifunctional peptidase 2) | 2.59  |
| 10097                                      | ACTR2    | ARP2 actin-related protein 2 homolog (yeast)                                              | 2.59  |
| 780                                        | DDR1     | discoidin domain receptor family, member 1                                                | 2.58  |
| 6541                                       | SLC7A1   | solute carrier family 7 (cationic amino acid transporter, y+ system), member 1            | 2.56  |
| 5420                                       | PODXL    | podocalyxin-like                                                                          | 2.56  |
| 1307                                       | COL16A1  | collagen, type XVI, alpha 1                                                               | 2.55  |
| 10437                                      | IFI30    | interferon, gamma-inducible protein 30                                                    | 2.55  |
| 9852                                       | EPM2AIP1 | EPM2A (laforin) interacting protein 1                                                     | 2.55  |
| 301                                        | ANXA1    | annexin A1                                                                                | 2.53  |
| 6366                                       | CCL21    | chemokine (C-C motif) ligand 21                                                           | 2.47  |
| 22856                                      | CHSY1    | carbohydrate (chondroitin) synthase 1                                                     | 2.45  |
| 162                                        | AP1B1    | adaptor-related protein complex 1, beta 1 subunit                                         | 2.45  |
| 7004                                       | TEAD4    | TEA domain family member 4                                                                | 2.39  |
| 54898                                      | ELOVL2   | elongation of very long chain fatty acids (FEN1/Elo2, SUR4/Elo3, yeast)-like 2            | 2.39  |
| 6925                                       | TCF4     | transcription factor 4                                                                    | 2.38  |
| 9819                                       | TSC22D2  | TSC22 domain family, member 2                                                             | 2.38  |
| 1847                                       | DUSP5    | dual specificity phosphatase 5                                                            | 2.36  |
| 8030                                       | CCDC6    | coiled-coil domain containing 6                                                           | 2.36  |
| 962                                        | CD48     | CD48 molecule                                                                             | 2.35  |
| 10188                                      | TNK2     | tyrosine kinase, non-receptor, 2                                                          | 2.35  |
| 1601                                       | DAB2     | disabled homolog 2, mitogen-responsive phosphoprotein (Drosophila)                        | 2.35  |
| 4017                                       | LOXL2    | lysyl oxidase-like 2                                                                      | 2.34  |
| 6035                                       | RNASE1   | ribonuclease, RNase A family, 1 (pancreatic)                                              | 2.34  |
| 4026                                       | LPP      | LIM domain containing preferred translocation partner in lipoma                           | 2.33  |
| 7852                                       | CXCR4    | chemokine (C-X-C motif) receptor 4                                                        | 2.33  |
| 6586                                       | SLIT3    | slit homolog 3 (Drosophila)                                                               | 2.31  |
| 11259                                      | FILIP1L  | filamin A interacting protein 1-like                                                      | 2.25  |
| 6363                                       | CCL19    | chemokine (C-C motif) ligand 19                                                           | 2.23  |
| 11214                                      | AKAP13   | A kinase (PRKA) anchor protein 13                                                         | 2.23  |
| <b>Genes Correlated with Good Survival</b> |          |                                                                                           |       |
| 223                                        | ALDH9A1  | aldehyde dehydrogenase 9 family, member A1                                                | -3.34 |
| 7276                                       | TTR      | transthyretin (prealbumin, amyloidosis type I)                                            | -3.27 |

|       |          |                                                                                                                                |       |
|-------|----------|--------------------------------------------------------------------------------------------------------------------------------|-------|
| 6018  | RLF      | rearranged L-myc fusion                                                                                                        | -3.23 |
| 3612  | IMPA1    | inositol(myo)-1(or 4)-monophosphatase 1                                                                                        | -3.22 |
| 5207  | PFKFB1   | 6-phosphofructo-2-kinase/fructose-2,6-biphosphatase 1                                                                          | -3.22 |
| 6296  | ACSM3    | acyl-CoA synthetase medium-chain family member 3                                                                               | -3.21 |
| 151   | ADRA2B   | adrenergic, alpha-2B-, receptor                                                                                                | -3.19 |
| 5771  | PTPN2    | protein tyrosine phosphatase, non-receptor type 2                                                                              | -3.12 |
| 5691  | PSMB3    | proteasome (prosome, macropain) subunit, beta type, 3                                                                          | -3.09 |
| 5502  | PPP1R1A  | protein phosphatase 1, regulatory (inhibitor) subunit 1A                                                                       | -3.07 |
| 27346 | TMEM97   | transmembrane protein 97                                                                                                       | -3.06 |
| 5313  | PKLR     | pyruvate kinase, liver and RBC                                                                                                 | -3.01 |
| 9252  | RPS6KA5  | ribosomal protein S6 kinase, 90kDa, polypeptide 5                                                                              | -3.00 |
| 1528  | CYB5A    | cytochrome b5 type A (microsomal)                                                                                              | -2.96 |
| 6447  | SCG5     | secretogranin V (7B2 protein)                                                                                                  | -2.93 |
| 25828 | TXN2     | thioredoxin 2                                                                                                                  | -2.90 |
| 5340  | PLG      | plasminogen                                                                                                                    | -2.88 |
| 6309  | SC5DL    | sterol-C5-desaturase (ERG3 delta-5-desaturase homolog, <i>S. cerevisiae</i> )-like                                             | -2.87 |
| 367   | AR       | androgen receptor (dihydrotestosterone receptor; testicular feminization; spinal and bulbar muscular atrophy; Kennedy disease) | -2.84 |
| 3479  | IGF1     | insulin-like growth factor 1 (somatomedin C)                                                                                   | -2.84 |
| 8802  | SUCLG1   | succinate-CoA ligase, GDP-forming, alpha subunit                                                                               | -2.84 |
| 23498 | HAO      | 3-hydroxyanthranilate 3,4-dioxygenase                                                                                          | -2.83 |
| 735   | C9       | complement component 9                                                                                                         | -2.83 |
| 9013  | TAF1C    | TATA box binding protein (TBP)-associated factor, RNA polymerase I, C, 110kDa                                                  | -2.82 |
| 1371  | CPOX     | coproporphyrinogen oxidase                                                                                                     | -2.82 |
| 7507  | XPA      | xeroderma pigmentosum, complementation group A                                                                                 | -2.82 |
| 3026  | HABP2    | hyaluronan binding protein 2                                                                                                   | -2.81 |
| 2690  | GHR      | growth hormone receptor                                                                                                        | -2.77 |
| 5105  | PCK1     | phosphoenolpyruvate carboxykinase 1 (soluble)                                                                                  | -2.76 |
| 6718  | AKR1D1   | aldo-keto reductase family 1, member D1 (delta 4-3-ketosteroid-5-beta-reductase)                                               | -2.76 |
| 128   | ADH5     | alcohol dehydrogenase 5 (class III), chi polypeptide                                                                           | -2.75 |
| 16    | AARS     | alanyl-tRNA synthetase                                                                                                         | -2.70 |
| 732   | C8B      | complement component 8, beta polypeptide                                                                                       | -2.69 |
| 51237 | MGC29506 | NA                                                                                                                             | -2.67 |
| 10159 | ATP6AP2  | ATPase, H+ transporting, lysosomal accessory protein 2                                                                         | -2.67 |
| 9732  | DOCK4    | dedicator of cytokinesis 4                                                                                                     | -2.66 |
| 5627  | PROS1    | protein S (alpha)                                                                                                              | -2.66 |
| 7709  | ZBTB17   | zinc finger and BTB domain containing 17                                                                                       | -2.65 |
| 1603  | DAD1     | defender against cell death 1                                                                                                  | -2.65 |
| 1678  | TIMM8A   | translocase of inner mitochondrial membrane 8 homolog A (yeast)                                                                | -2.65 |
| 3155  | HMGCL    | 3-hydroxymethyl-3-methylglutaryl-Coenzyme A lyase (hydroxymethylglutaricaciduria)                                              | -2.65 |

|        |         |                                                                                                                                                            |       |
|--------|---------|------------------------------------------------------------------------------------------------------------------------------------------------------------|-------|
| 725    | C4BPB   | complement component 4 binding protein, beta                                                                                                               | -2.62 |
| 7189   | TRAF6   | TNF receptor-associated factor 6                                                                                                                           | -2.62 |
| 1967   | EIF2B1  | eukaryotic translation initiation factor 2B, subunit 1 alpha, 26kDa                                                                                        | -2.61 |
| 3990   | LIPC    | lipase, hepatic                                                                                                                                            | -2.60 |
| 10026  | PIGK    | phosphatidylinositol glycan anchor biosynthesis, class K                                                                                                   | -2.60 |
| 80344  | WDR23   | WD repeat domain 23                                                                                                                                        | -2.59 |
| 5982   | RFC2    | replication factor C (activator 1) 2, 40kDa                                                                                                                | -2.58 |
| 2915   | GRM5    | glutamate receptor, metabotropic 5                                                                                                                         | -2.56 |
| 6391   | SDHC    | succinate dehydrogenase complex, subunit C, integral membrane protein, 15kDa                                                                               | -2.55 |
| 2073   | ERCC5   | excision repair cross-complementing rodent repair deficiency, complementation group 5 (xeroderma pigmentosum, complementation group G (Cockayne syndrome)) | -2.54 |
| 2158   | F9      | coagulation factor IX (plasma thromboplastic component, Christmas disease, hemophilia B)                                                                   | -2.54 |
| 157567 | ANKRD46 | ankyrin repeat domain 46                                                                                                                                   | -2.54 |
| 417    | ART1    | ADP-ribosyltransferase 1                                                                                                                                   | -2.54 |
| 1486   | CTBS    | chitinase, di-N-acetyl-                                                                                                                                    | -2.54 |
| 2542   | SLC37A4 | solute carrier family 37 (glucose-6-phosphate transporter), member 4                                                                                       | -2.53 |
| 211    | ALAS1   | aminolevulinic acid, delta-, synthase 1                                                                                                                    | -2.53 |
| 27072  | VPS41   | vacuolar protein sorting 41 homolog (S. cerevisiae)                                                                                                        | -2.51 |
| 2642   | GCGR    | glucagon receptor                                                                                                                                          | -2.51 |
| 10694  | CCT8    | chaperonin containing TCP1, subunit 8 (theta)                                                                                                              | -2.51 |
| 25874  | BRP44   | brain protein 44                                                                                                                                           | -2.50 |
| 2868   | GRK4    | G protein-coupled receptor kinase 4                                                                                                                        | -2.50 |
| 3336   | HSPE1   | heat shock 10kDa protein 1 (chaperonin 10)                                                                                                                 | -2.50 |
| 79731  | NARS2   | asparaginyl-tRNA synthetase 2, mitochondrial (putative)                                                                                                    | -2.49 |
| 667    | DST     | dystonin                                                                                                                                                   | -2.49 |
| 27032  | ATP2C1  | ATPase, Ca <sup>++</sup> transporting, type 2C, member 1                                                                                                   | -2.48 |
| 10327  | AKR1A1  | aldo-keto reductase family 1, member A1 (aldehyde reductase)                                                                                               | -2.48 |
| 2010   | EMD     | emerin (Emery-Dreifuss muscular dystrophy)                                                                                                                 | -2.47 |
| 799    | CALCR   | calcitonin receptor                                                                                                                                        | -2.45 |
| 22839  | DLGAP4  | discs, large (Drosophila) homolog-associated protein 4                                                                                                     | -2.45 |
| 6240   | RRM1    | ribonucleotide reductase M1 polypeptide                                                                                                                    | -2.44 |
| 29937  | NENF    | neuron derived neurotrophic factor                                                                                                                         | -2.44 |
| 29887  | SNX10   | sorting nexin 10                                                                                                                                           | -2.44 |
| 5372   | PMM1    | phosphomannomutase 1                                                                                                                                       | -2.44 |
| 6999   | TDO2    | tryptophan 2,3-dioxygenase                                                                                                                                 | -2.43 |
| 2944   | GSTM1   | glutathione S-transferase M1                                                                                                                               | -2.43 |
| 6721   | SREBF2  | sterol regulatory element binding transcription factor 2                                                                                                   | -2.42 |
| 26469  | PTPN18  | protein tyrosine phosphatase, non-receptor type 18 (brain-derived)                                                                                         | -2.42 |
| 27163  | ASAH1   | N-acylsphingosine amidohydrolase (acid ceramidase)-like                                                                                                    | -2.41 |
| 5336   | PLCG2   | phospholipase C, gamma 2 (phosphatidylinositol-specific)                                                                                                   | -2.41 |

|        |          |                                                                        |       |
|--------|----------|------------------------------------------------------------------------|-------|
| 3760   | KCNJ3    | potassium inwardly-rectifying channel, subfamily J, member 3           | -2.40 |
| 5833   | PCYT2    | phosphate cytidyltransferase 2, ethanolamine                           | -2.40 |
| 2705   | GJB1     | gap junction protein, beta 1, 32kDa                                    | -2.39 |
| 7108   | TM7SF2   | transmembrane 7 superfamily member 2                                   | -2.39 |
| 8991   | SELENBP1 | selenium binding protein 1                                             | -2.38 |
| 316    | AOX1     | aldehyde oxidase 1                                                     | -2.37 |
| 10444  | ZER1     | zer-1 homolog (C. elegans)                                             | -2.37 |
| 130    | ADH6     | alcohol dehydrogenase 6 (class V)                                      | -2.36 |
| 2956   | MSH6     | mutS homolog 6 (E. coli)                                               | -2.36 |
| 8671   | SLC4A4   | solute carrier family 4, sodium bicarbonate cotransporter, member 4    | -2.34 |
| 9097   | USP14    | ubiquitin specific peptidase 14 (tRNA-guanine transglycosylase)        | -2.34 |
| 727    | C5       | complement component 5                                                 | -2.32 |
| 5893   | RAD52    | RAD52 homolog (S. cerevisiae)                                          | -2.32 |
| 116496 | FAM129A  | family with sequence similarity 129, member A                          | -2.31 |
| 10458  | BAIAP2   | BAI1-associated protein 2                                              | -2.31 |
| 6744   | SSFA2    | sperm specific antigen 2                                               | -2.30 |
| 5446   | PON3     | paraoxonase 3                                                          | -2.30 |
| 2646   | GCKR     | glucokinase (hexokinase 4) regulator                                   | -2.30 |
| 1385   | CREB1    | cAMP responsive element binding protein 1                              | -2.30 |
| 23316  | CUTL2    | cut-like 2 (Drosophila)                                                | -2.29 |
| 6427   | SFRS2    | splicing factor, arginine/serine-rich 2                                | -2.28 |
| 3156   | HMGCR    | 3-hydroxy-3-methylglutaryl-Coenzyme A reductase                        | -2.28 |
| 2677   | GGCX     | gamma-glutamyl carboxylase                                             | -2.27 |
| 1555   | CYP2B6   | cytochrome P450, family 2, subfamily B, polypeptide 6                  | -2.26 |
| 7739   | ZNF185   | zinc finger protein 185 (LIM domain)                                   | -2.26 |
| 378    | ARF4     | ADP-ribosylation factor 4                                              | -2.23 |
| 10965  | ACOT2    | acyl-CoA thioesterase 2                                                | -2.22 |
| 513    | ATP5D    | ATP synthase, H+ transporting, mitochondrial F1 complex, delta subunit | -2.22 |
| 1369   | CPN1     | carboxypeptidase N, polypeptide 1                                      | -2.20 |
| 5331   | PLCB3    | phospholipase C, beta 3 (phosphatidylinositol-specific)                | -2.20 |
| 3642   | INSM1    | insulinoma-associated 1                                                | -2.18 |
| 5442   | POLRMT   | polymerase (RNA) mitochondrial (DNA directed)                          | -2.14 |
| 11145  | HRASLS3  | HRAS-like suppressor 3                                                 | -2.13 |

Cox scores were calculated in the training set as previously reported (5).

**Supplementary Table 4.** Enrichment of the 186-gene signature in rodent models of chronic liver disease.

| <b>Model</b>          | <b>Enrichment of Poor-Prognosis Signature</b> | <b>Enrichment of Good-Prognosis Signature</b> | <b>Reference</b> |
|-----------------------|-----------------------------------------------|-----------------------------------------------|------------------|
| KLF6 +/- mouse        | 0.05                                          | 0.24                                          | (13)             |
| Mst1/2 -/- mouse      | 0.81                                          | 0.003                                         | (14)             |
| Notch1 tg mouse       | 0.45                                          | 0.01                                          | (15)             |
| DEN rat               | 0.001                                         | < 0.001                                       | this study       |
| CCL4 mouse            | 0.19                                          | 0.004                                         | this study       |
| Bile duct ligated rat | 0.001                                         | 0.11                                          | (16)             |

False discovery rates (FDR) in Gene Set Enrichment Analysis is presented.

### **Supplementary Figure Legends**

#### **Supplementary Figure 1. DEN induces cirrhosis and hepatocellular carcinoma**

**(HCC) in a rat model.** Male Wistar rats received weekly intraperitoneal injections of PBS or DEN (50 mg/kg diluted in PBS) for 8, 12 or 18 weeks. **(A)** Representative rat livers at the time of sacrifice. **(B)** Representative H&E staining of formalin-fixed paraffin embedded (FFPE) liver tissue (Magnification 100X). **(C)** Representative Masson's trichrome staining of FFPE liver tissue (Magnification 100X). **(D)** Masson's trichrome stains of liver sections were scored by the method of Ishak (n = 6 for all groups). **(E)** Collagen levels were morphometrically quantified from Sirius red stained sections. **(F)** Rat weights. **(G)** Liver weight expressed as percent body weight at week 18. **(G)** Representative H&E staining of a well-differentiated HCC in a liver after 18 weeks of DEN administration. \*\* p < 0.01 compared to PBS.

#### **Supplementary Figure 2. DEN induces progressive liver injury and liver failure in a**

**rat model.** Male Wistar rats received weekly intraperitoneal injections of PBS or DEN for 8, 12 or 18 weeks. Serum levels (n = 4 for all groups) of **(A)** alkaline phosphatase (ALP), **(B)** alanine transaminase (ALT), **(C)** aspartate transaminase (AST) **(D)** total bilirubin (TBIL) **(E)** albumin (Alb) and **(F)** glucose (Glu). \* p < 0.05 and \*\* p < 0.01 compared to PBS.

#### **Supplementary Figure 3. Expression of cytochrome P450 2E1 (CYP2E1) in DEN-**

**injured rats and CCl<sub>4</sub>-injured mice. (A)** Male Wistar rats received PBS (-) or DEN (+) for 18 weeks. DEN-injured rats received vehicle control (-) or erlotinib (0.5 (+) or 2 mg/kg (++)) during weeks 13 -18. Expression of CYP2E1 was determined by quantitative real-time PCR. ## p < 0.01 compared to PBS. **(B)** Male A/J mice were administered either



0.1cc of a 40% solution of CCl<sub>4</sub> in olive oil (+) or olive oil alone (-) for 18 weeks. CCl<sub>4</sub>-injured mice received vehicle control (-) or erlotinib (2 (+) or 5 mg/kg (++)) during weeks 13 - 18. Expression of CYP2E1 was determined by quantitative real-time PCR. ## p < 0.01 compared to olive oil alone and \*\* p < 0.01 compared to CCl<sub>4</sub>-injured.

**Supplementary Figure 4. Deregulation of cirrhosis-related molecular pathways in**

**human and rodent transcriptome datasets. (A)** Enrichment of cirrhosis-related molecular pathways in human cirrhosis and rodent models of liver injury, fibrosis, and/or carcinogenesis. We analyzed previously reported transcriptome datasets from human (NCBI Gene Expression Omnibus, GSE6764, 10 healthy livers vs. 13 cirrhotic livers) (17), Bile duct ligation (BDL) rat (GSE13747, 6 BDL rats vs. 6 controls) (16), Notch1 transgenic mouse (GSE33560, 6 transgenic vs. 5 controls) (15), Klf6 knockout mouse (GSE23375, 4 knockouts vs. 4 controls) (13), and Mst1/2 knockout mouse (14) in addition to the current datasets for DEN rat and CCl<sub>4</sub> mouse. The molecular pathway gene sets representing inflammatory response (GeneOntology, [www.geneontology.org](http://www.geneontology.org)), blood coagulation and global metabolism (KEGG, [www.genome.jp/kegg](http://www.genome.jp/kegg)), bile acid synthesis and platelet-related biology (REACTOME, [www.reactome.org](http://www.reactome.org)), and glucose metabolism (SABiosciences, [www.sabiosciences.com](http://www.sabiosciences.com)) were obtained from Molecular Signature Database (MSigDB, [www.broadinstitute.org/msigdb](http://www.broadinstitute.org/msigdb)). Induction or suppression of each pathway gene set was quantitatively evaluated by GSEA ([www.broadinstitute.org/gsea](http://www.broadinstitute.org/gsea)) (11) as normalized gene set enrichment score. **(B)** Similarity of cirrhosis-related molecular pathway activation status between human cirrhosis and the rodent models of liver injury, fibrosis, and/or carcinogenesis. Similarity was assessed for each group of each molecular pathway. For the groups with multiple pathway gene sets, similarity of the profiles of the normalized gene set enrichment score was measured by Pearson correlation coefficient and the samples were clustered by

using hierarchical clustering with average linkage method. For the groups with only one pathway gene set, clustering was performed based on similarity of the normalized gene set enrichment score. In summary, DEN rat, CCl<sub>4</sub> mouse, BDL rat, and Mst1/2ko mouse showed globally similar pathway deregulation patterns and modest correlation to human (“All Pathways”). Examining each pathway separately, we found that “Bile Acid Synthesis” and “Platelet-Related Pathways” were generally very similar between human and all the rodent models, while induction of “Inflammatory Response” and suppression of “Coagulation” pathways in human were closest to the DEN rat. For “Global Metabolism”, all rodent models (with Klf6-ko mouse being a little outstanding) formed a cluster and were distinct from human, but some models (including DEN rat and BDL rat) did show a weak positive correlation with human. Lastly, “Glucose Metabolism” showed the most distinct difference between human and the rodent models where a negative correlation was observed, and this may explain the modest recovery of serum glucose levels in our models after treatment with erlotinib.

**Supplementary Figure 5. DEN administration reproduces a gene expression signature associated with poor survival in human cirrhosis patients.** Male Wistar rats received weekly intraperitoneal injections of DEN or PBS for 8, 12 or 18 weeks. GSEA analysis of the **(A)** 73-gene poor-prognosis signature and **(B)** 113-gene good-prognosis signature in response to DEN administration for 12 weeks or 18 weeks.

**Supplementary Figure 6. Erlotinib reverses a gene expression signature associated with poor survival in human cirrhosis patients and inhibits HSC activation in CCl<sub>4</sub>-treated mice.** Male A/J mice were administered either 0.1cc of a 40% solution of CCl<sub>4</sub> in olive oil (OO) (+) or olive oil alone (-) by oral gavage three times a week for 18 weeks. A subset of mice received vehicle control (-) or erlotinib (2 (+) or 5

mg/kg (++) daily (5 days/week) during weeks 13 - 18. Mice were sacrificed at 19 weeks after a one-week washout to eliminate acute effects of CCl<sub>4</sub>. GSEA analysis of the **(A)** 73-gene poor-prognosis signature and **(B)** 113-gene good-prognosis signature in response to CCl<sub>4</sub> administration for 18 weeks. **(C)** Erlotinib reverses the 186-gene signature that is predictive of prognosis in human cirrhosis and HCC patients. **(D)** Representative photomicrographs of liver sections that were stained for  $\alpha$ -SMA as a marker for activated HSC (Magnification 40X).

**Supplementary Figure 7. Expression of EGFR ligands in DEN-injured rats, CCl<sub>4</sub>-injured mice and BDL rats. (A)** Male Wistar rats received PBS (-) or DEN (+) for 18 weeks. DEN-injured rats received vehicle control (-) or erlotinib (0.5 (+) or 2 mg/kg (++)) during weeks 13 -18. The expression of amphiregulin (AREG), betacellulin (BTC), epiregulin (EREG), heparin-binding EGF (HB-EGF) and transforming growth factor-alpha (TGF- $\alpha$ ) was determined by quantitative real-time PCR. # p < 0.05 compared to PBS. **(B)** Male A/J mice were administered either 0.1cc of a 40% solution of CCl<sub>4</sub> in olive oil (+) or olive oil alone (-) for 18 weeks. CCl<sub>4</sub>-injured mice received vehicle control (-) or erlotinib (2 (+) or 5 mg/kg (++)) during weeks 13 - 18. The expression of amphiregulin (AREG), betacellulin (BTC), epiregulin (EREG), heparin-binding EGF (HB-EGF) and transforming growth factor-alpha (TGF- $\alpha$ ) was determined by quantitative real-time PCR. # p < 0.05 compared to olive oil alone and \* p < 0.05 or \*\* p < 0.01 compared to CCl<sub>4</sub>-injured. **(C)** Male Wistar rats that had undergone a sham operation (-) or BDL (+) received vehicle control (-) or erlotinib (2 mg/kg (+)) beginning 4 days after the BDL and ending on Day 21. The expression of amphiregulin (AREG), betacellulin (BTC), epiregulin (EREG), heparin-binding EGF (HB-EGF) and transforming growth factor-alpha

(TGF- $\alpha$ ) was determined by quantitative real-time PCR. #  $p < 0.05$  or ##  $p < 0.01$  compared to sham operation and \*  $p < 0.05$  compared to BDL.

**Supplementary Figure 8. EGF-target gene signatures are induced in the surrounding non-tumoral liver tissue of DEN-treated animals and reversed after treatment with erlotinib.** GSEA evaluating induction of previously reported EGF target gene signatures in **(A,B,C)** the surrounding non-tumoral liver tissue of rats treated with PBS or DEN for 18 weeks, or **(D,E,F)** the surrounding non-tumoral liver tissue or **(G,H,I)** tumor tissue of rats treated with DEN for 18 weeks plus either vehicle or erlotinib (2 mg/kg) during weeks 13 - 18. EGF target gene signatures were generated in **(A,D,G)** primary human foreskin microvascular endothelial cells (9), **(B, E,H)** a normal human breast epithelial cell line MCF10A, and **(C,F,I)** a human cervical cancer cell line HeLa (10).

**Supplementary Figure 9. EGFR signaling is present in HSC in human liver cirrhosis and erlotinib inhibits HSC activation.** **(A)** Liver sections from human cirrhosis patients were co-stained for p-EGFR (Y1068) and either GFAP, desmin or  $\alpha$ -SMA (Magnification 400X). **(B)** Representative western blot analysis of TWNT-4 cells treated with 100 ng/ml EGF in the absence or presence of 2  $\mu$ M erlotinib for 30 minutes. **(C)** Expression of  $\alpha$ -SMA and  $\alpha$ 1(I) procollagen in TWNT-4 cells after treatment with or without 2  $\mu$ M erlotinib for 72 hours was determined by quantitative real-time PCR.

**Supplementary Figure 10. Erlotinib inhibits HSC activation in BDL rats.** Male Wistar rats that had undergone a sham operation (-) or BDL (+) received IP injections of vehicle control (-) or erlotinib (2 mg/kg (+)) beginning 4 days after the BDL and ending on Day

21. Representative photomicrographs of liver sections that were stained for  $\alpha$ -SMA as a marker for activated HSC (Magnification 100X).

**Supplementary Figure 11. EGF expression in the surrounding non-tumoral liver tissue but not the tumor is associated with survival in HCC patients.** Gene-expression profiling was previously performed on tumor and surrounding tissue from patients who were consecutively treated with surgery for primary HCC and for whom data on clinical outcomes (over a median follow-up period of 7.8 years) were available (8). **(A)** Surrounding non-tumor and **(B)** HCC tissue samples from the same patients were analyzed to identify the samples with the highest EGF expression (90<sup>th</sup> percentile). The association between survival and high EGF expression in either **(C)** surrounding non-tumor or **(D)** HCC tissue samples was analyzed by Cox score.

## **Supplementary References**

1. Shibata N, Watanabe T, Okitsu T, Sakaguchi M, Takesue M, Kunieda T, Omoto K, et al. Establishment of an immortalized human hepatic stellate cell line to develop antifibrotic therapies. *Cell Transplant* 2003;12:499-507.
2. Friedman SL, Roll FJ. Isolation and culture of hepatic lipocytes, Kupffer cells, and sinusoidal endothelial cells by density gradient centrifugation with Stractan. *Anal Biochem* 1987;161:207-218.
3. Ishak KG. Chronic hepatitis: morphology and nomenclature. *Mod Pathol* 1994;7: 690-713.
4. Hutson PR, Crawford ME, Sorkness RL. Liquid chromatographic determination of hydroxyproline in tissue samples. *J Chromatogr B Analyt Technol Biomed Life Sci* 2003;791:427-430.
5. Fuchs BC, Fujii T, Dorfman JD, Goodwin JM, Zhu AX, Lanuti M, Tanabe KK. Epithelial-to-mesenchymal transition and integrin-linked kinase mediate sensitivity to epidermal growth factor receptor inhibition in human hepatoma cells. *Cancer Res* 2008;68:2391-2399.
6. Workman C, Jensen LJ, Jarmer H, Berka R, Gautier L, Nielser HB, Saxild HH, et al. A new non-linear normalization method for reducing variability in DNA microarray experiments. *Genome Biol* 2002;3:research0048.
7. Hoshida Y, Villanueva A, Sangiovanni A, Sole M, Hur C, Andersson KL, Chung RT, et al. Prognostic gene-expression signature for patients with hepatitis C-related early-stage cirrhosis. *Gastroenterology* 2013;144:1024-1030.
8. Hoshida Y, Villanueva A, Kobayashi M, Peix J, Chiang DY, Camargo A, Gupta S, et al. Gene expression in fixed tissues and outcome in hepatocellular carcinoma. *N Engl J Med* 2008;359:1995-2004.
9. Zhang HT, Gorn M, Smith K, Graham AP, Lau KK, Bicknell R. Transcriptional profiling of human microvascular endothelial cells in the proliferative and quiescent state using cDNA arrays. *Angiogenesis* 1999;3:211-219.
10. Amit I, Citri A, Shay T, Lu Y, Katz M, Zhang F, Tarcic G, et al. A module of negative feedback regulators defines growth factor signaling. *Nat Genet* 2007;39:503-512.
11. Subramanian A, Tamayo P, Mootha VK, Mukherjee S, Ebert BL, Gillette MA, Paulovich A, et al. Gene set enrichment analysis: a knowledge-based approach for interpreting genome-wide expression profiles. *Proc Natl Acad Sci USA* 2005;102:15545-15550.
12. Reich M, Liefeld T, Gould J, Lerner J, Tamayo P, Mesirov JP. GenePattern 2.0. *Nat Genet* 2006;38:500-501.
13. Tarocchi M, Hannivoort R, Hoshida Y, Lee UE, Vetter D, Narla G, Villanueva A, et al. Carcinogen-induced hepatic tumors in KLF6<sup>+/-</sup> mice recapitulate aggressive human hepatocellular carcinoma associated with p53 pathway deregulation. *Hepatology* 2011;54:522-531.
14. Zhou D, Conrad C, Xia F, Park JS, Payer B, Yin Y, Lauwers GY, et al. Mst1 and Mst2 maintain hepatocyte quiescence and suppress hepatocellular carcinoma development through inactivation of the Yap1 oncogene. *Cancer Cell* 2009;16:425-438.
15. Villanueva A, Alsinet C, Yanger K, Hoshida Y, Zong Y, Toffanin S, Rodriguez-Carunchio L, et al. Notch signaling is activated in human hepatocellular carcinoma and induces tumor formation in mice. *Gastroenterology* 2012;143:1660-1669.
16. Moreno M, Chaves JF, Sancho-Bru P, Ramalho F, Ramalho LN, Mansego ML, Ivorra C, et al. Ghrelin attenuates hepatocellular injury and liver fibrogenesis in rodents and influences fibrosis progression in humans. *Hepatology* 2010;51:974-985.

17. Wurmbach E, Chen YB, Khitrov G, Zhang W, Roayaie S, Schwartz M, Fiel I, et al. Genome-wide molecular profiles of HCV-induced dysplasia and hepatocellular carcinoma. *Hepatology* 2007;45:938-947.

# Supplementary Figure 1

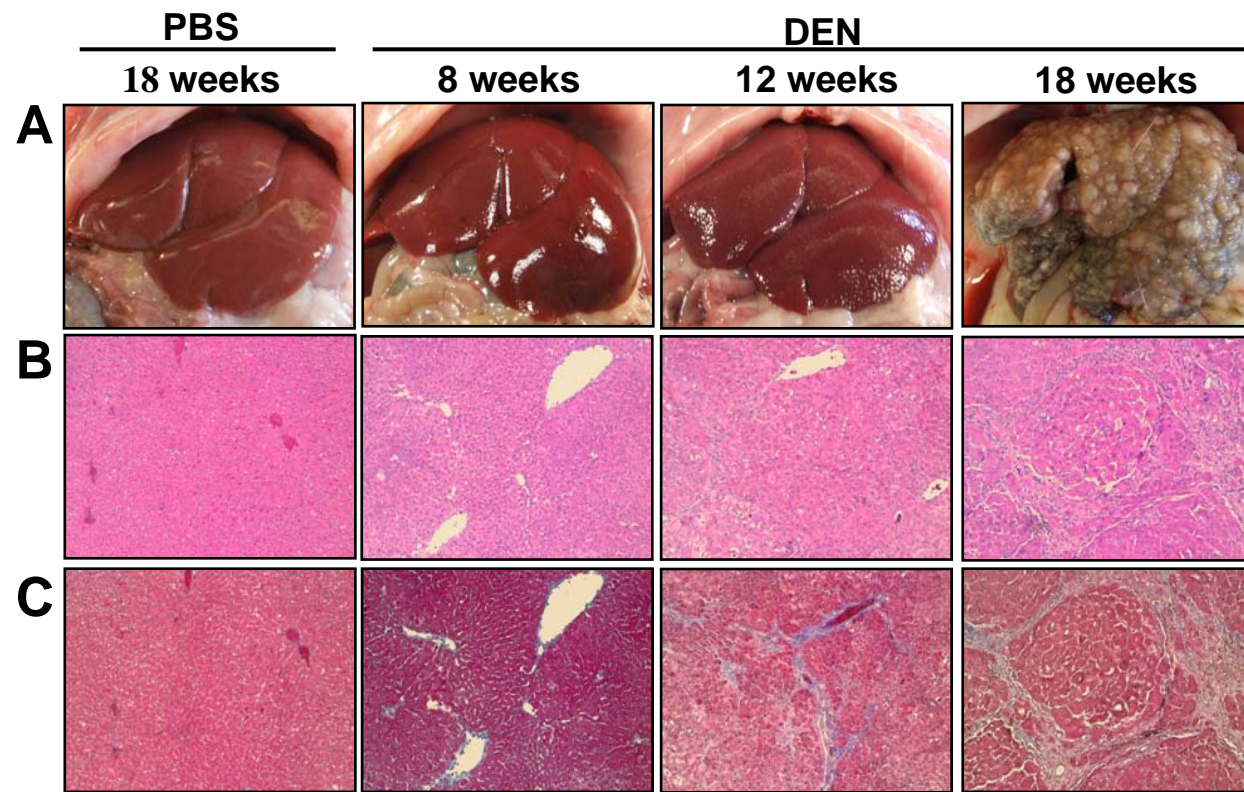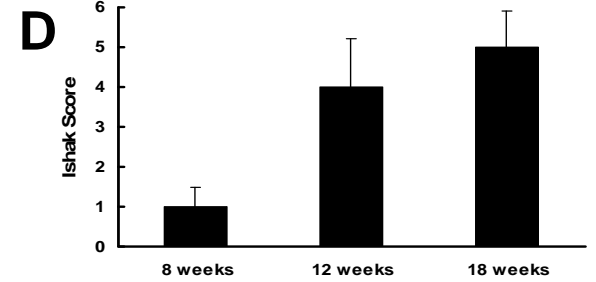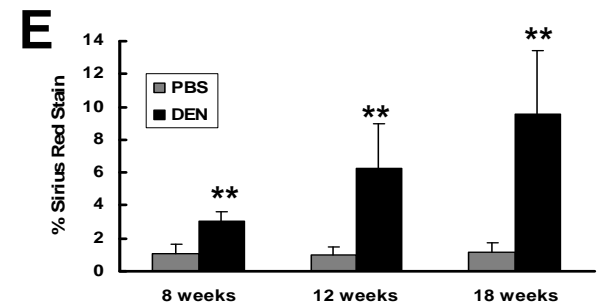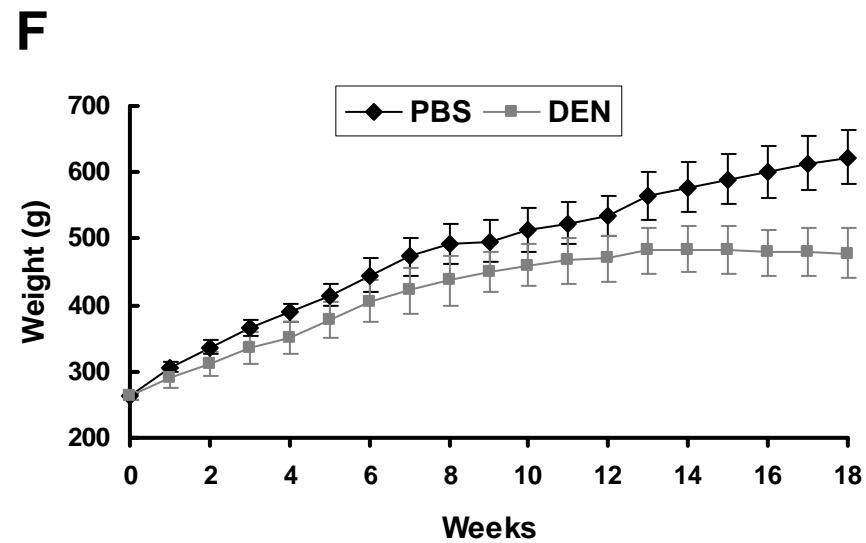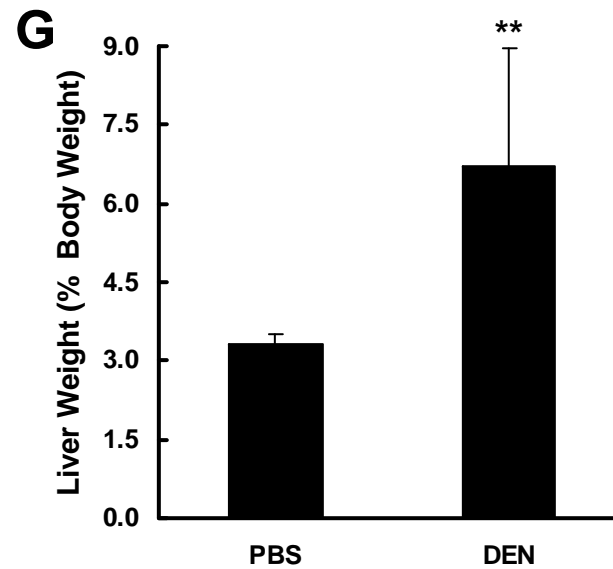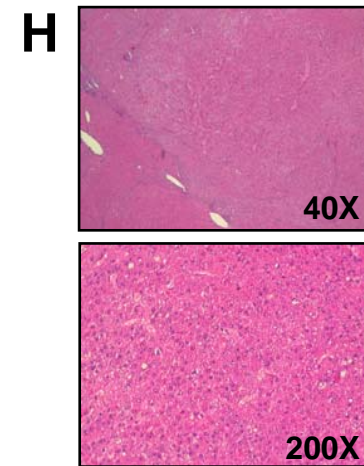



# Supplementary Figure 2

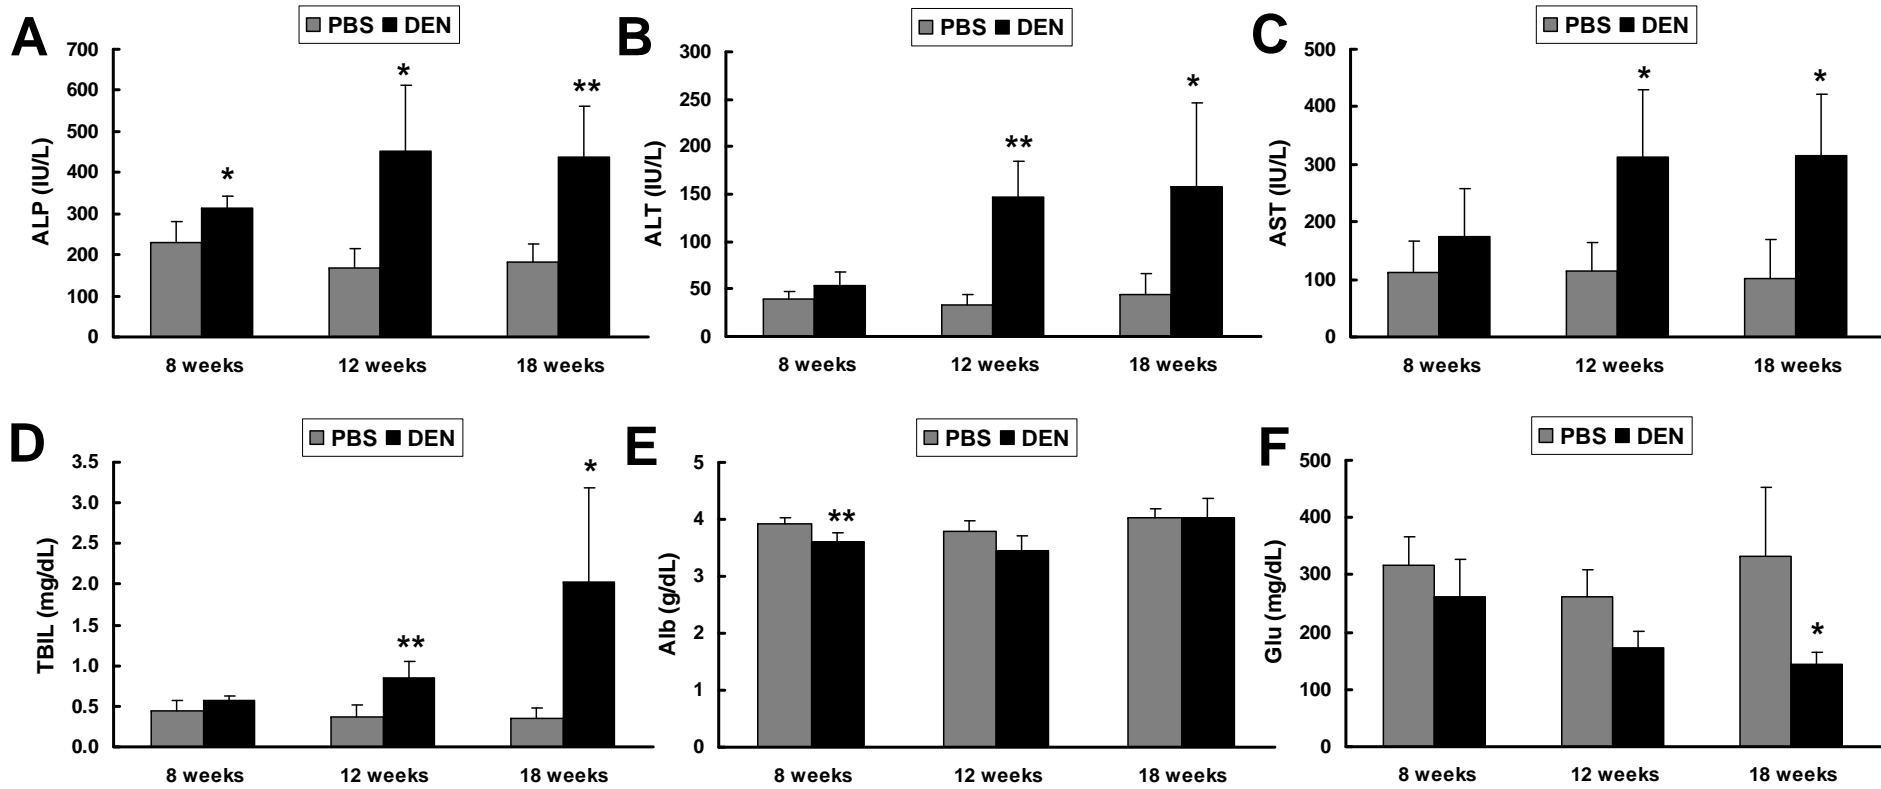

**A**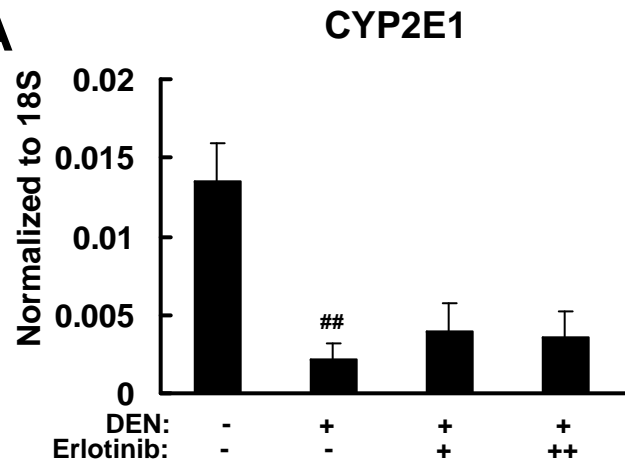**B**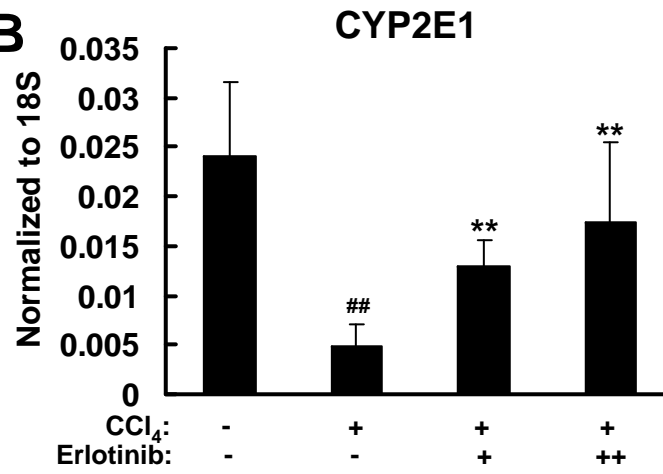

# Supplementary Figure 4A

Human cirrhosis  
DEN rat  
CCl4 mouse  
BDL rat  
Notch1-tg mouse  
Klf6-ko mouse  
Mst1/2-ko mouse

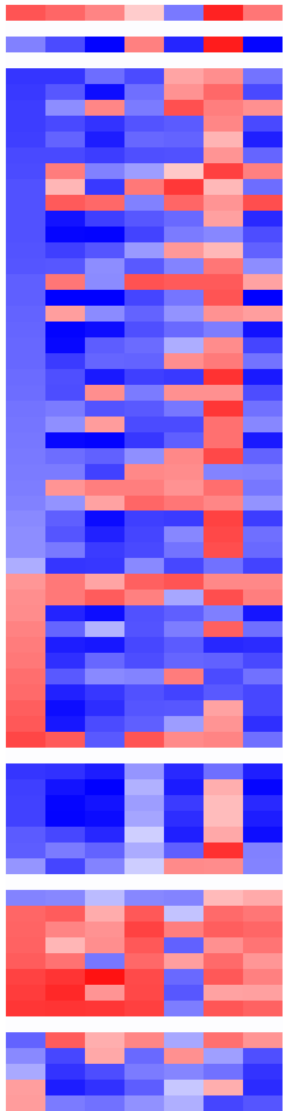

## Gene set database

GObp\_inflammatory

KEGG\_coagulation

KEGG\_metabolism

REACTOME\_bile\_acid

REACTOME\_bile\_acid

REACTOME\_bile\_acid

REACTOME\_bile\_acid

REACTOME\_bile\_acid

REACTOME\_bile\_acid

REACTOME\_bile\_acid

REACTOME\_platelet

REACTOME\_platelet

REACTOME\_platelet

REACTOME\_platelet

REACTOME\_platelet

REACTOME\_platelet

REACTOME\_platelet

REACTOME\_platelet

REACTOME\_platelet

SABio\_glucose\_metabolism

SABio\_glucose\_metabolism

SABio\_glucose\_metabolism

SABio\_glucose\_metabolism

SABio\_glucose\_metabolism

## Molecular pathways

INFLAMMATORY\_RESPONSE

COMPLEMENT\_AND\_COAGULATION\_CASCADES

GLYCINE\_SERINE\_AND\_THREONINE\_METABOLISM

SELENOAMINO\_ACID\_METABOLISM

PROPYANOATE\_METABOLISM

TRYPTOPHAN\_METABOLISM

NICOTINATE\_AND\_NICOTINAMIDE\_METABOLISM

HISTIDINE\_METABOLISM

ARGININE\_AND\_PROLINE\_METABOLISM

BETA\_ALANINE\_METABOLISM

ALANINE\_ASPARTATE\_AND\_Glutamate\_METABOLISM

FATTY\_ACID\_METABOLISM

DRUG\_METABOLISM\_OTHER\_ENZYMES

GLYOXYLATE\_AND\_DICARBOXYLATE\_METABOLISM

TYROSINE\_METABOLISM

AMINO\_SUGAR\_AND\_NUCLEOTIDE\_SUGAR\_METABOLISM

BUTANOATE\_METABOLISM

RETINOL\_METABOLISM

CYSTEINE\_AND\_METHIONINE\_METABOLISM

RIBOFLAVIN\_METABOLISM

PYRUVATE\_METABOLISM

PYRIMIDINE\_METABOLISM

INOSITOL\_PHOSPHATE\_METABOLISM

NITROGEN\_METABOLISM

PPAR\_SIGNALING\_PATHWAY

DRUG\_METABOLISM\_CYTOCHROME\_P450

STARCH\_AND\_SUCROSE\_METABOLISM

PORPHYRIN\_AND\_CHLOROPHYLL\_METABOLISM

ASCORBATE\_AND\_ALDARATE\_METABOLISM

PURINE\_METABOLISM

METABOLISM\_OF\_XENOBIOTICS\_BY\_CYTOCHROME\_P450

LINOLEIC\_ACID\_METABOLISM

PHENYLALANINE\_METABOLISM

TAURINE\_AND\_HYPOTAURINE\_METABOLISM

ALPHA\_LINOLENIC\_ACID\_METABOLISM

ARACHIDONIC\_ACID\_METABOLISM

GLUTATHIONE\_METABOLISM

SULFUR\_METABOLISM

GLYCEROLIPID\_METABOLISM

GLYCEROPHOSPHOLIPID\_METABOLISM

SPHINGOLIPID\_METABOLISM

FRUCTOSE\_AND\_MANNANOSE\_METABOLISM

ETHER\_LIPID\_METABOLISM

GALACTOSE\_METABOLISM

ALDOSTERONE\_REGULATED\_SODIUM\_REABSORPTION

SYNTHESIS\_OF\_BILE\_ACIDS\_AND\_BILE\_SALTS\_VIA\_24-HYDROXYCHOLESTEROL

BILE\_ACID\_AND\_BILE\_SALT\_METABOLISM

SYNTHESIS\_OF\_BILE\_ACIDS\_AND\_BILE\_SALTS\_VIA\_7ALPHA-HYDROXYCHOLESTEROL

SYNTHESIS\_OF\_BILE\_ACIDS\_AND\_BILE\_SALTS

RECYCLING\_OF\_BILE\_ACIDS\_AND\_SALTS

BILE\_SALT\_AND\_ORGANIC\_ANION\_SLC\_TRANSPORTERS

TRANSPORT\_OF\_GLUCOSE\_AND\_OTHER\_SUGARS\_BILE\_SALTS\_AND\_ORGANIC\_ACIDS\_METAL\_IONS\_AND\_AMINE\_COMPOUNDS

PLATELET\_CALCIIUM\_HOMEOSTASIS

PLATELET\_SENSITIZATION\_BY\_LDL

PLATELET\_HOMEOSTASIS

PLATELET\_AGGREGATION\_PLUG\_FORMATION

FACTORS\_INVOLVED\_IN\_MEGAKARYOCYTE\_DEVELOPMENT\_AND\_PLATELET\_PRODUCTION

RESPONSE\_TO\_ELEVATED\_PLATELET\_CYTOSOLIC\_CA2\_

PLATELET\_ADHESION\_TO\_EXPOSED\_COLLAGEN

PLATELET\_ACTIVATION\_SIGNALING\_AND\_AGGREGATION

PENTOSE\_PHOSPHATE\_PATHWAY

REGULATION

GLUCONEOGENESIS

TCA\_CYCLE

GLYCOLYSIS

Normalized gene set enrichment score

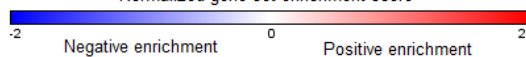

Negative enrichment

Positive enrichment

# Supplementary Figure 4B

## All Pathways

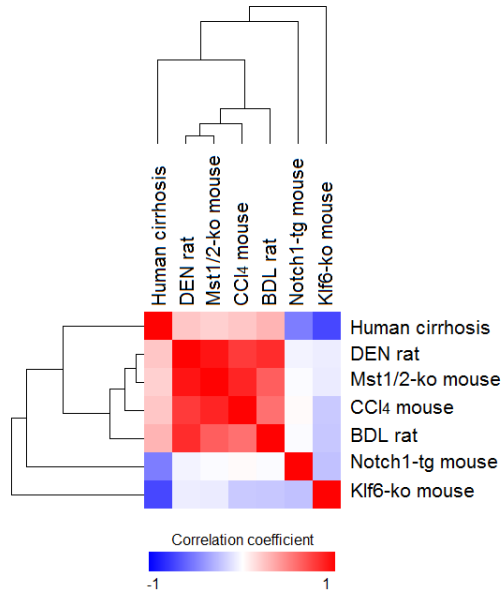

## Inflammatory Response

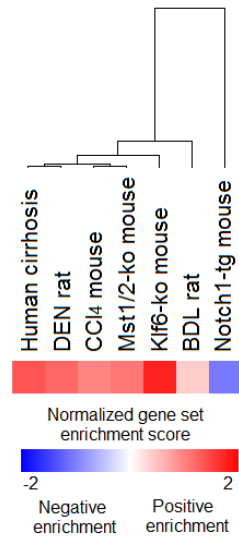

## Coagulation

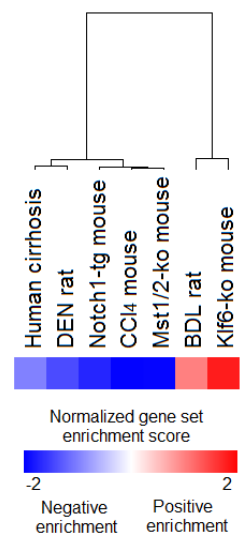

## Global Metabolism

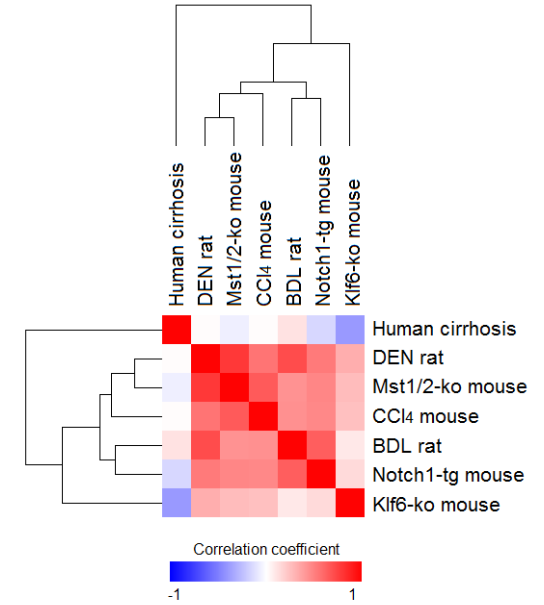

## Bile Acid Synthesis

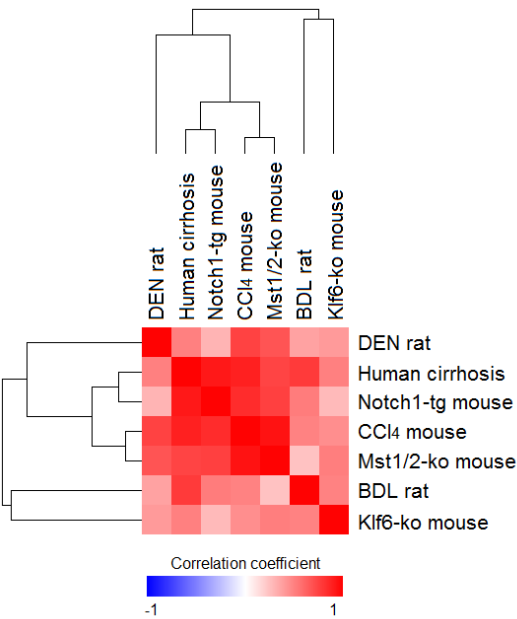

## Platelet-Related Pathways

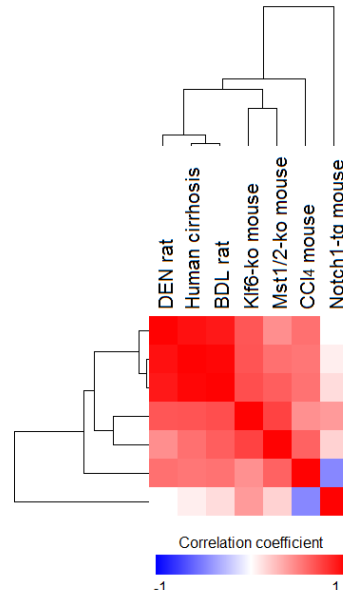

## Glucose Metabolism

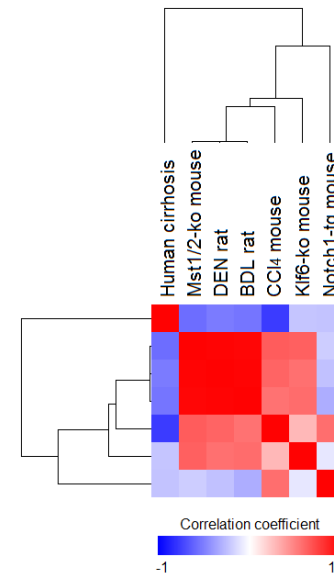

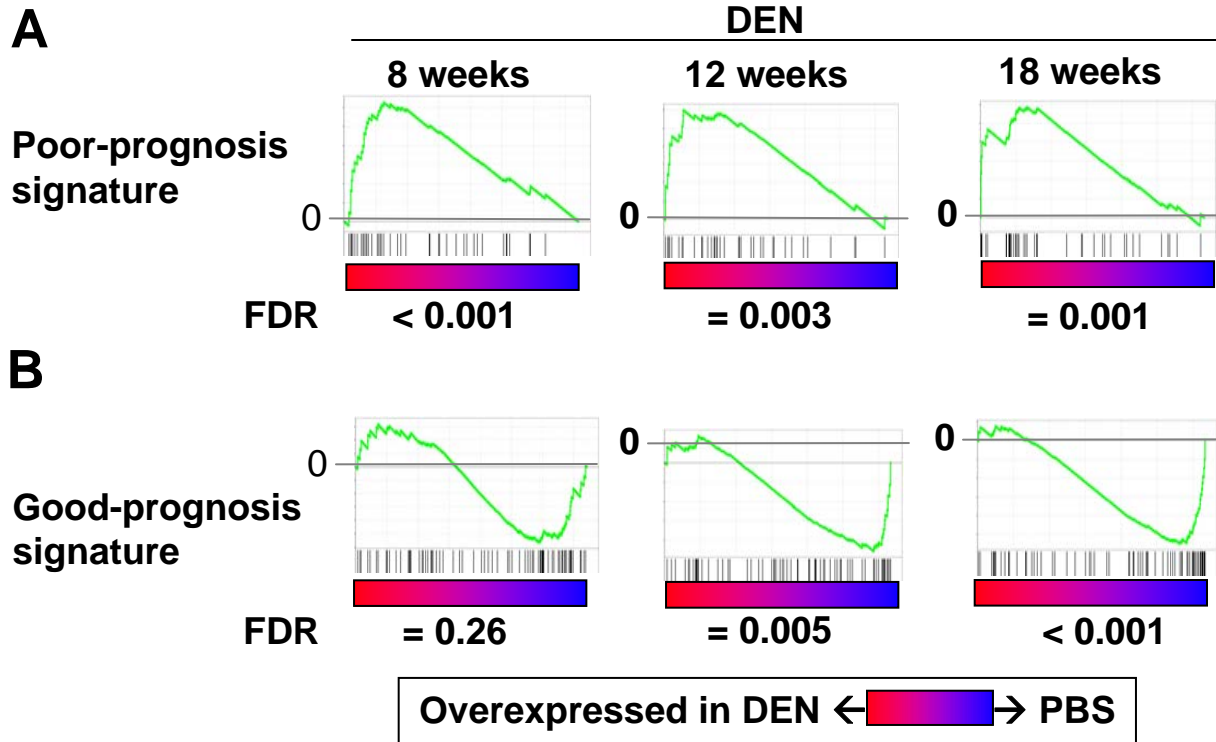

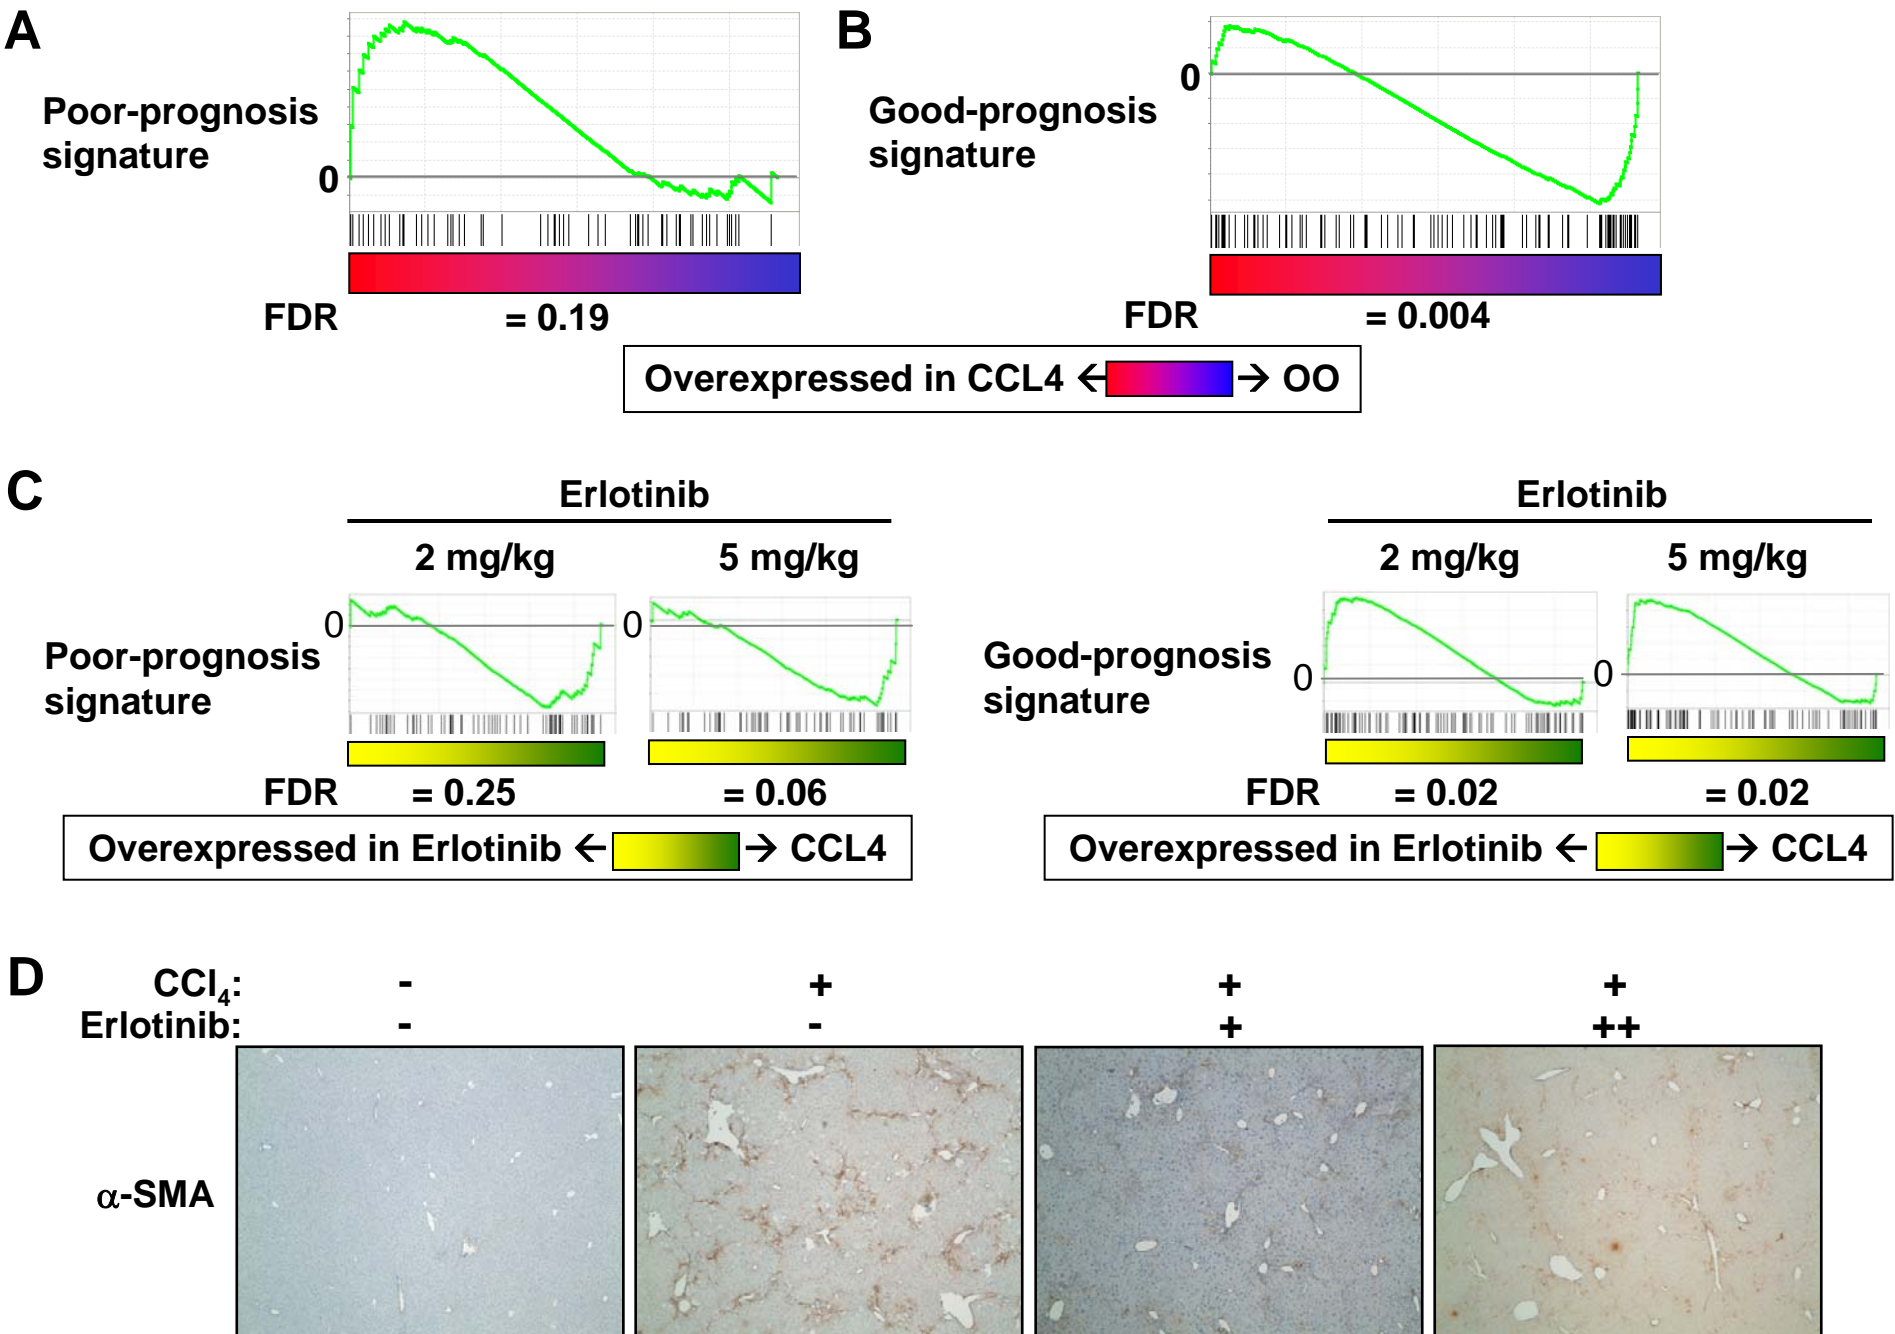

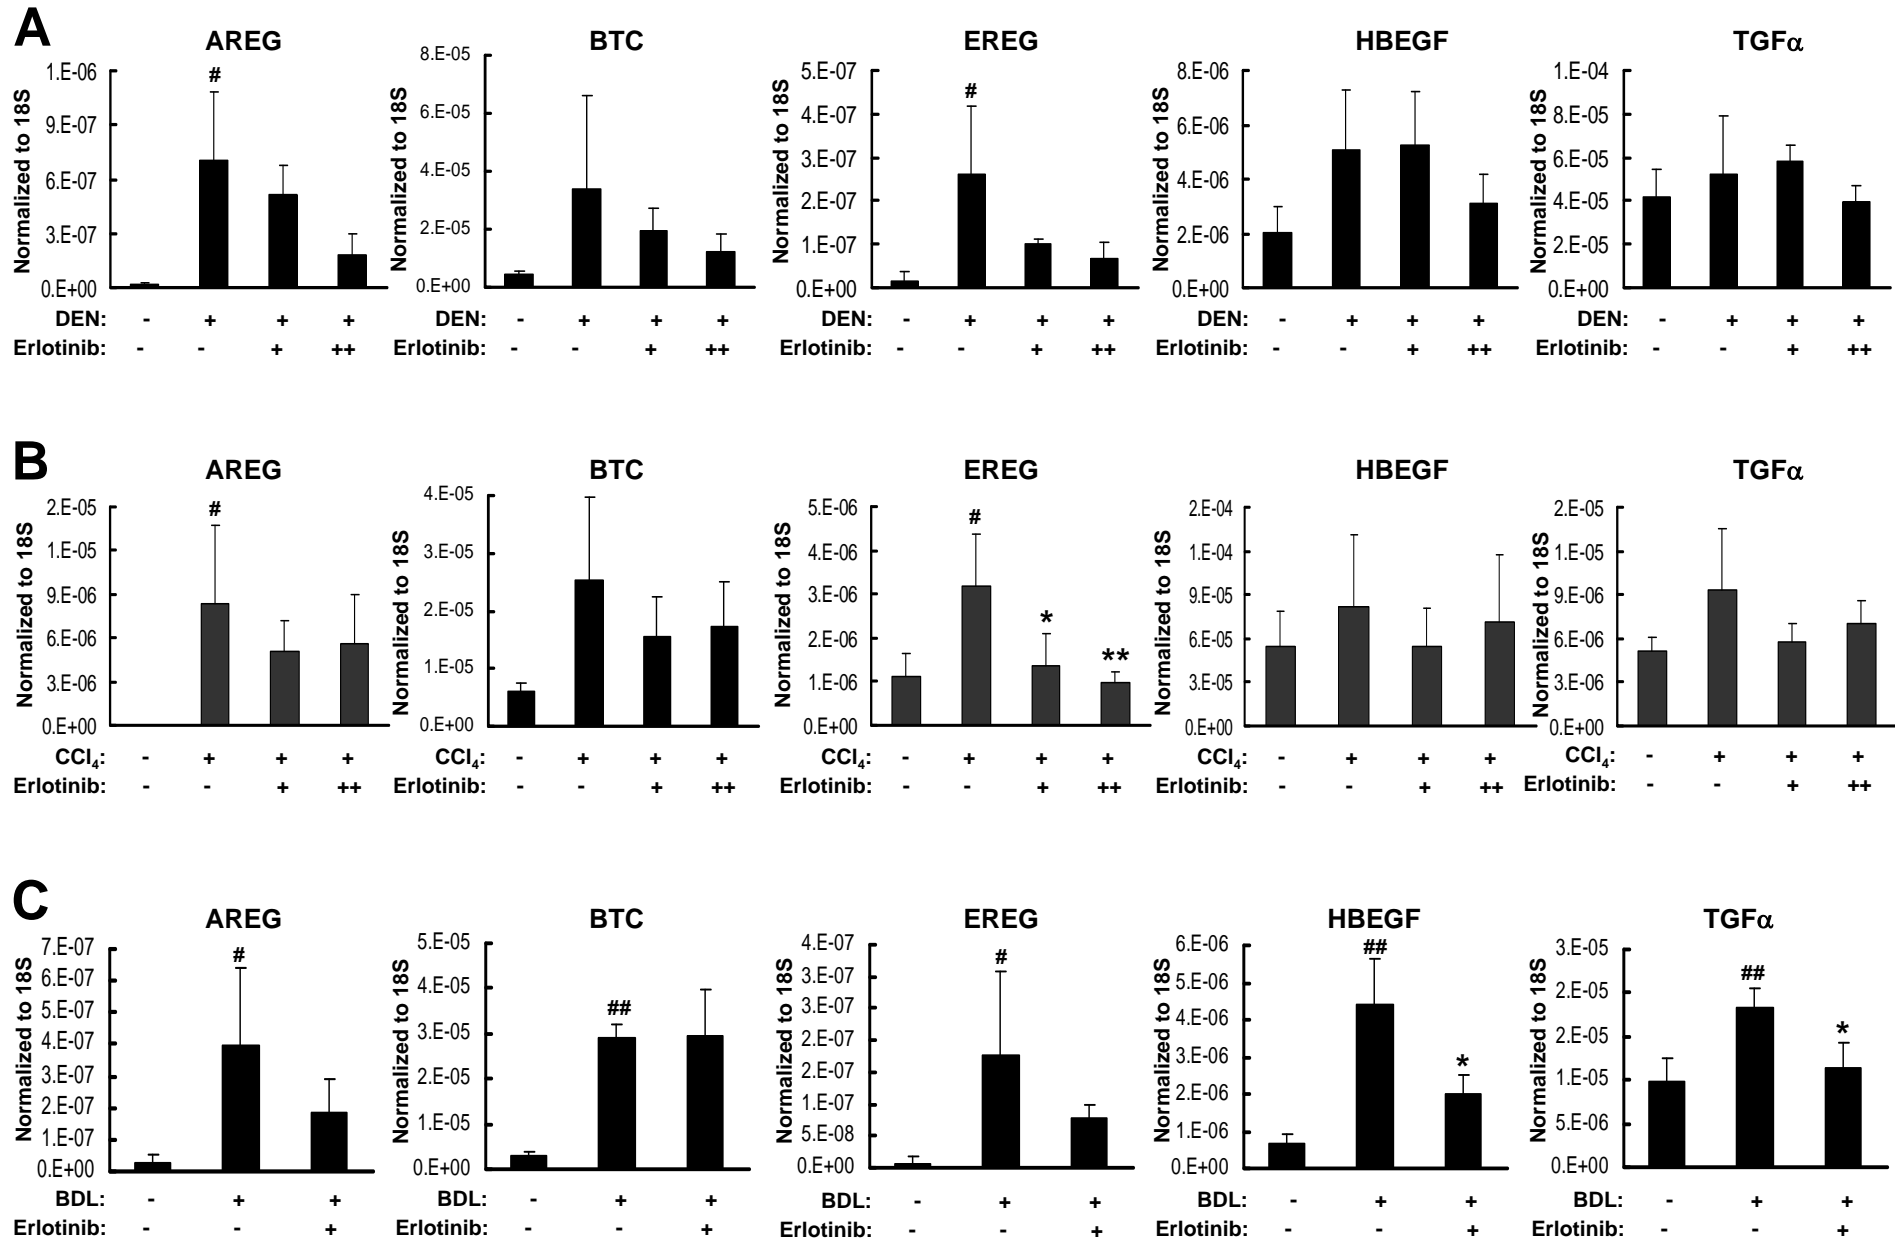

# Supplementary Figure 8

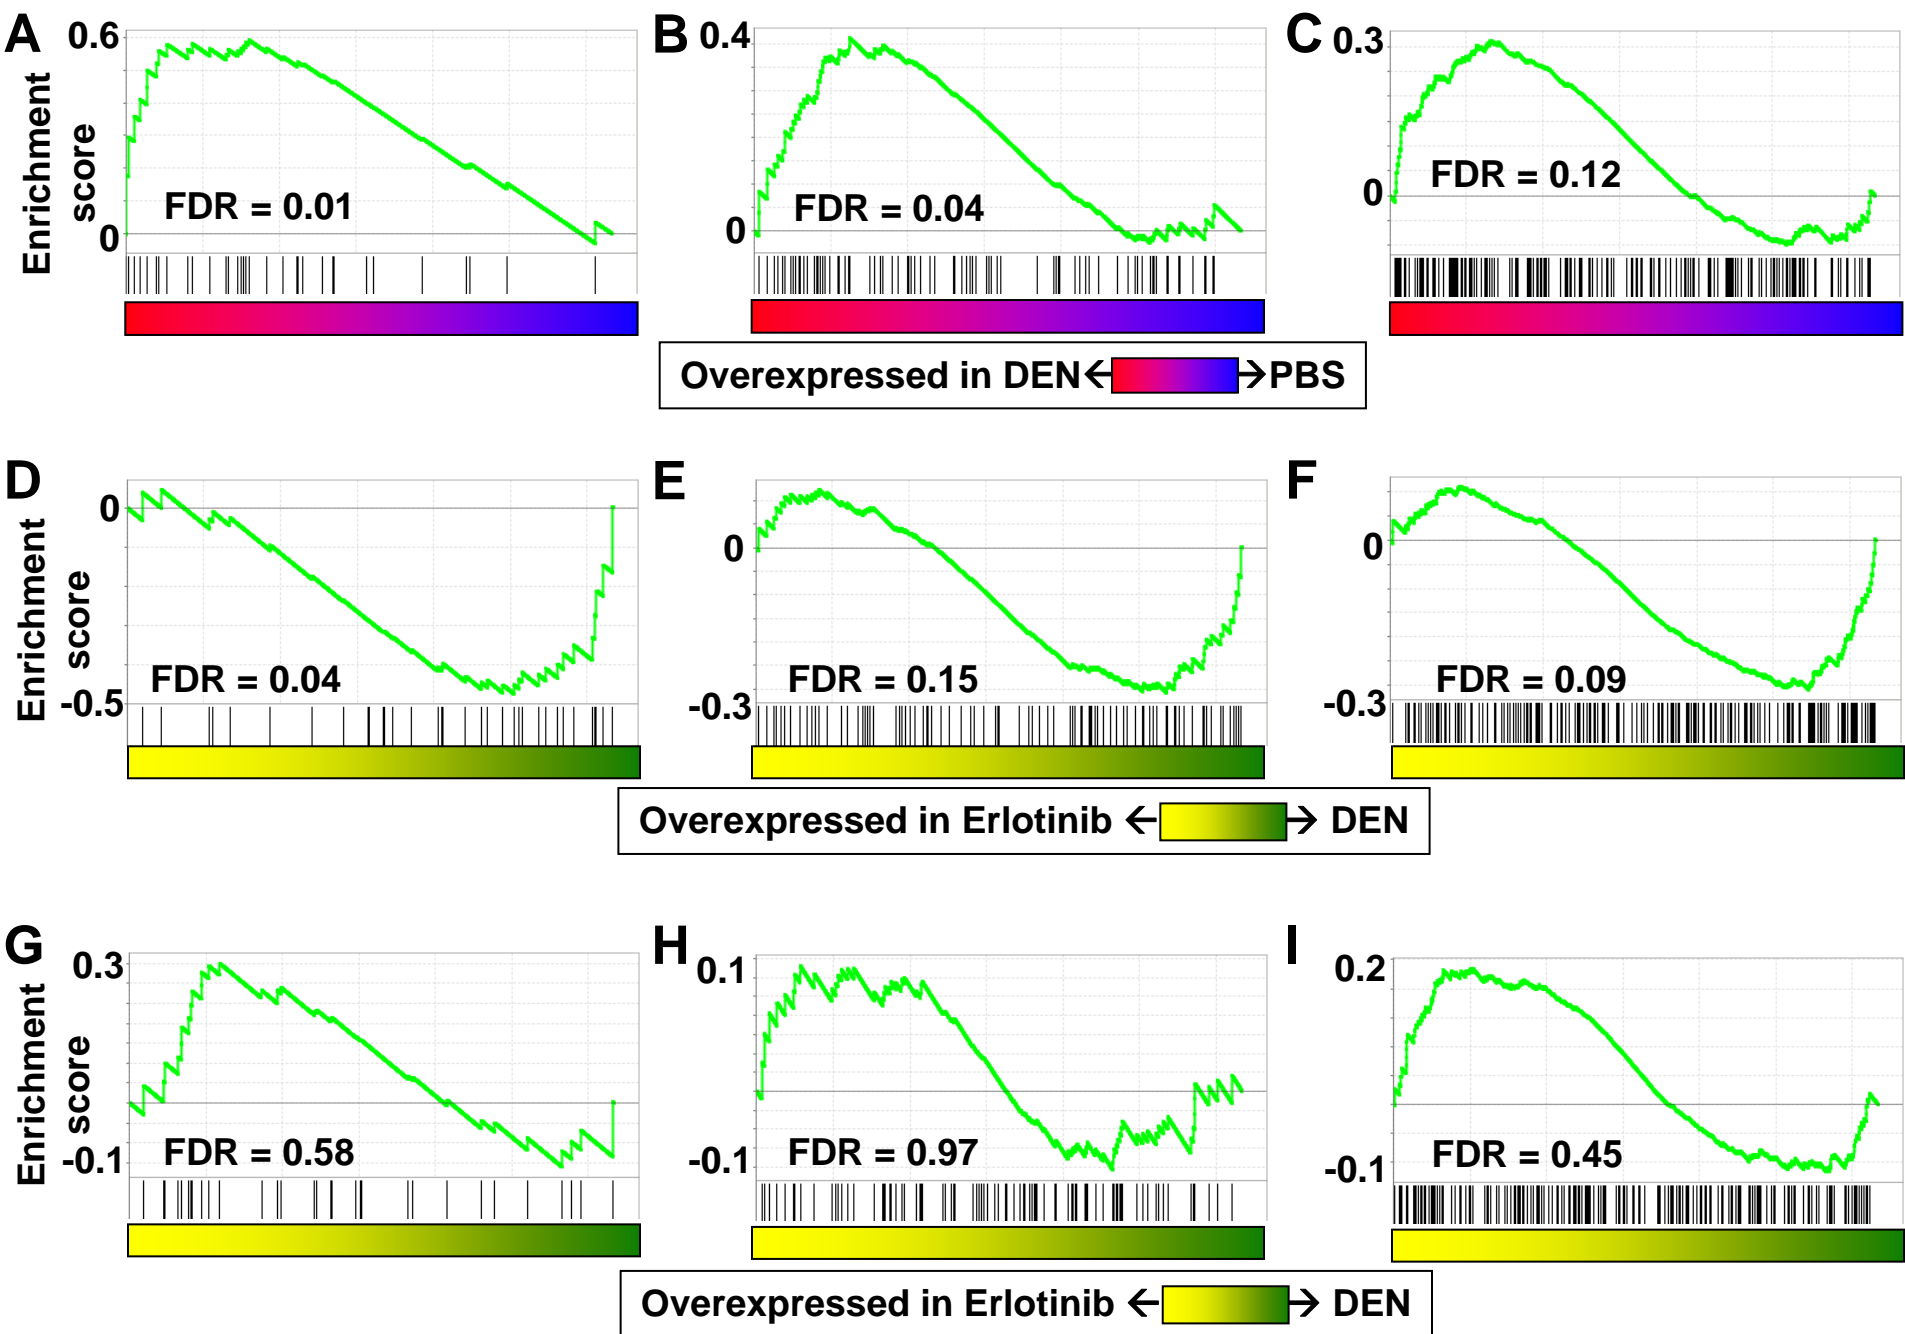



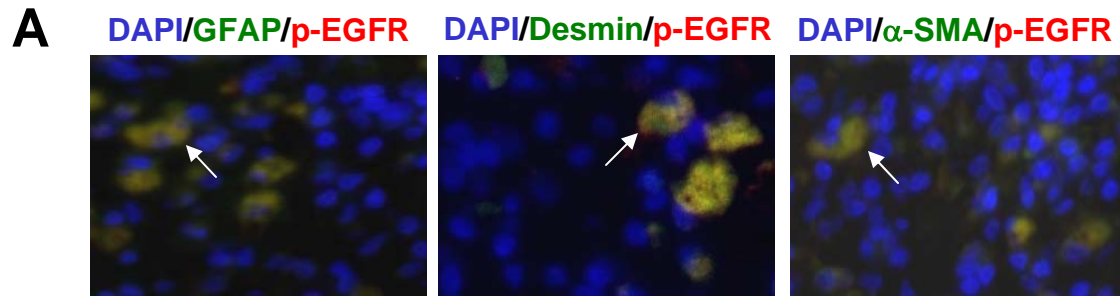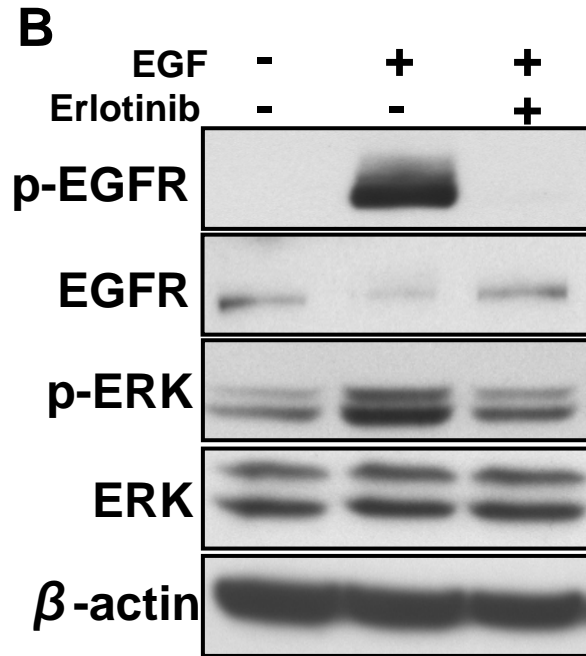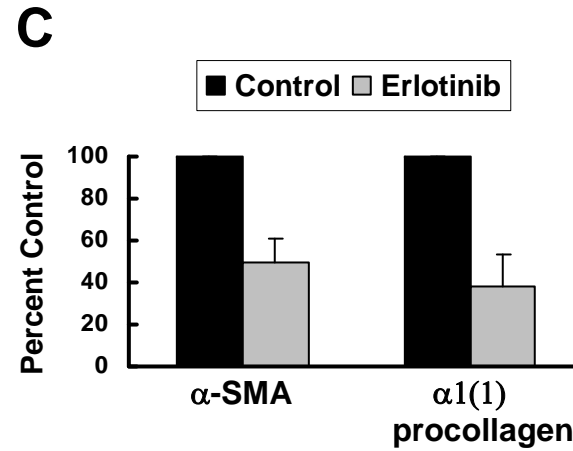

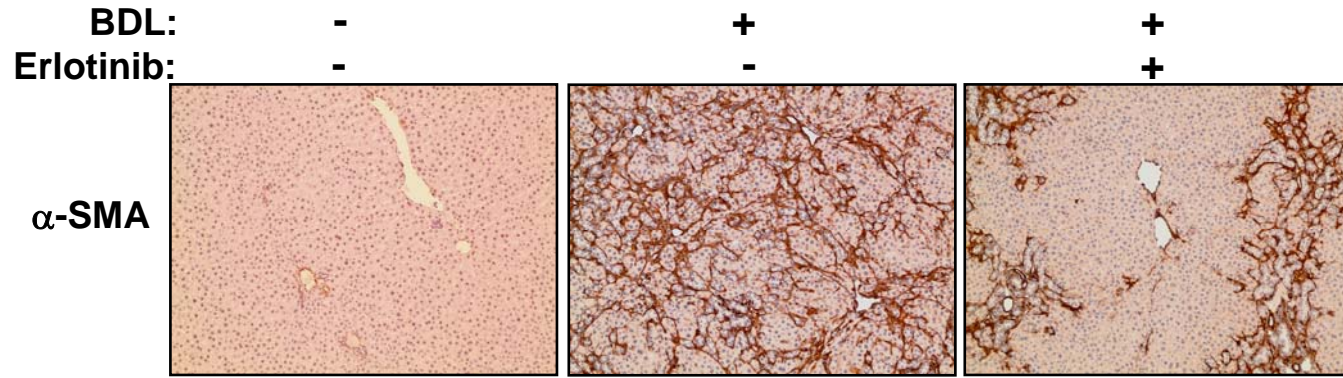

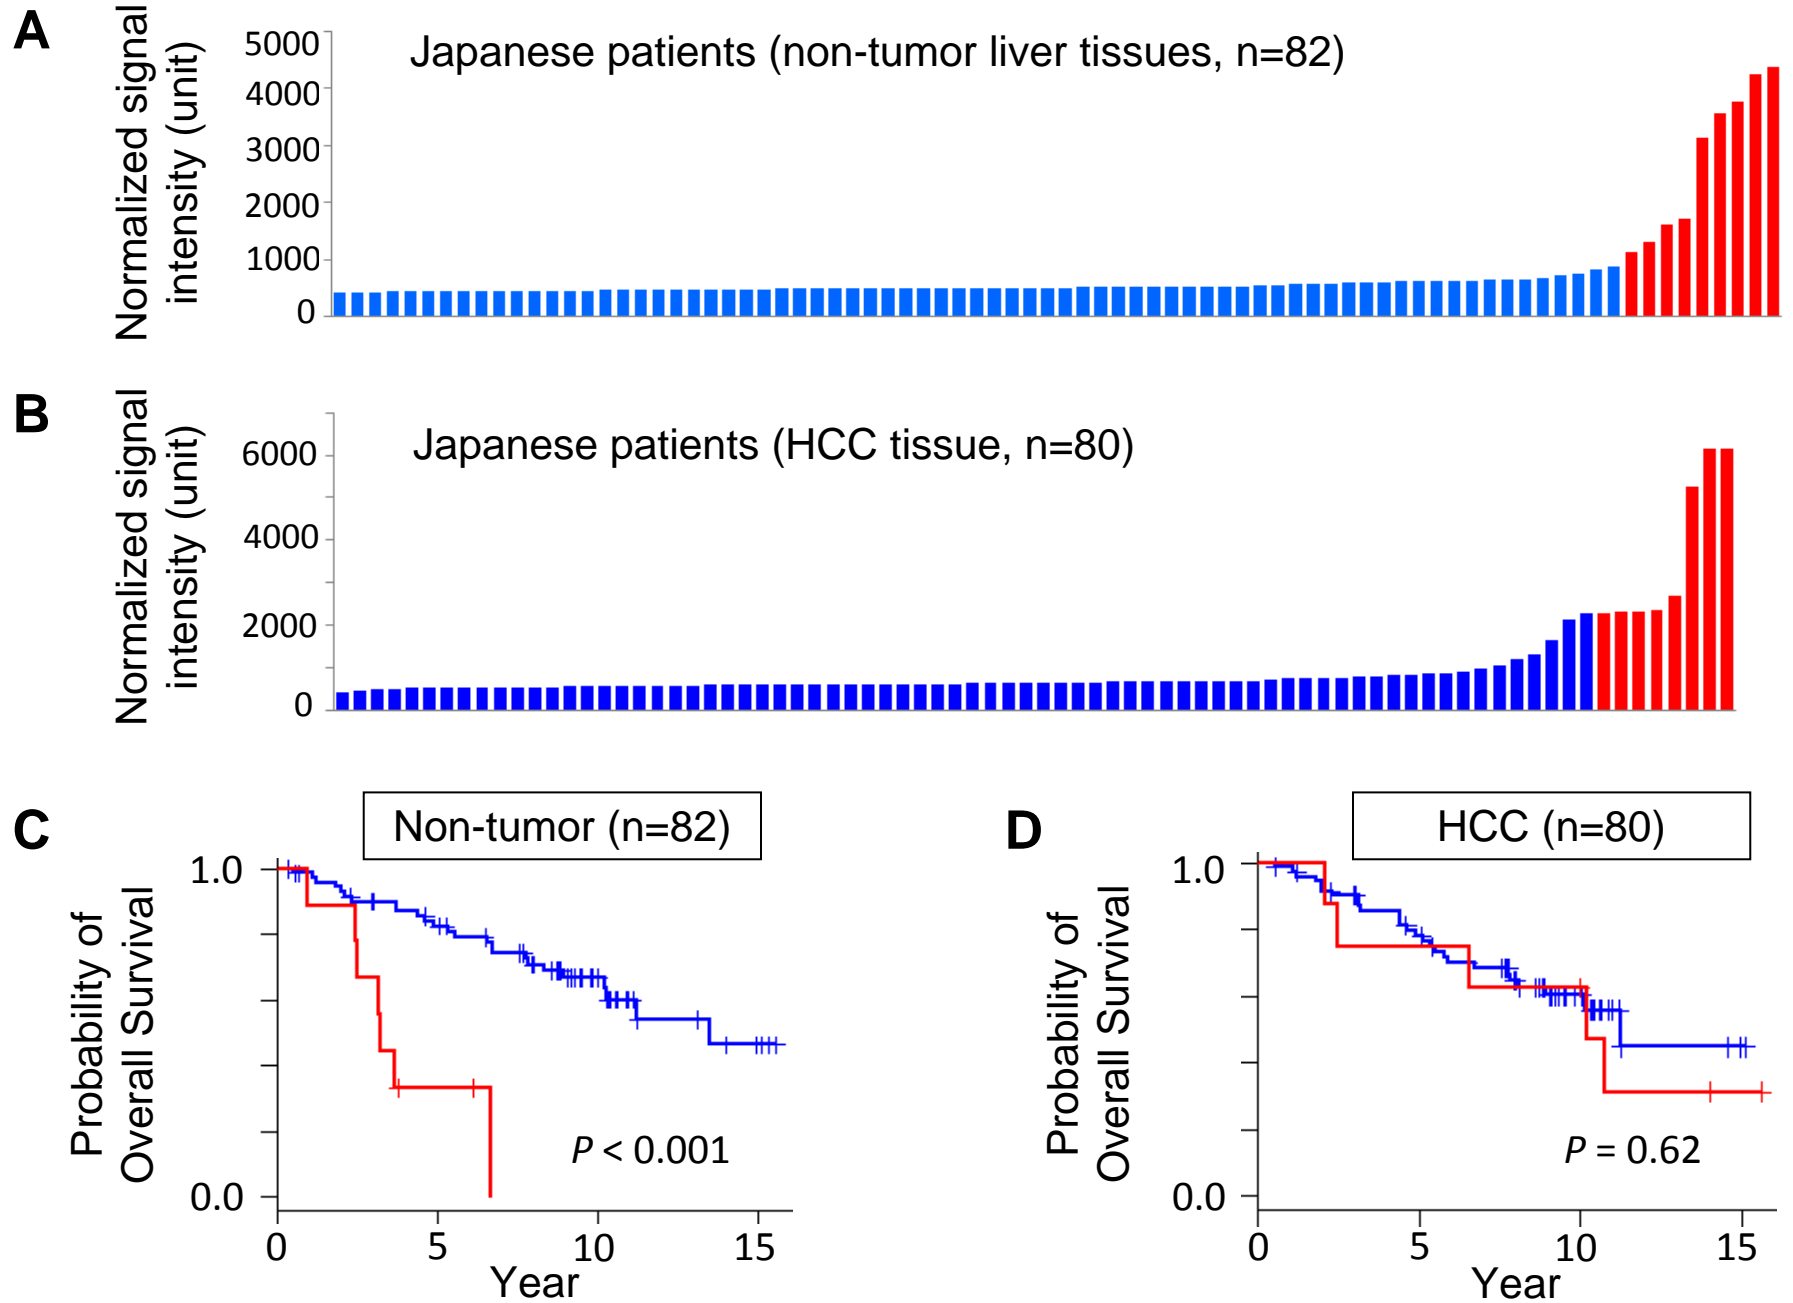

Supplement: NIHMS595708-supplement-01.pdf [file NIHMS595708-supplement-01.pdf]
